# Supplementary material for: The hijacking of a receptor kinase–driven pathway by a wheat fungal pathogen leads to disease
Source: PubMed Central journal article supplement — Sci Adv. 2016 Oct 26;2(10):e1600822. doi: 10.1126/sciadv.1600822 (PMC5091353; doi:10.1126/sciadv.1600822), 2016-10-26
Supplement: 1600822_SM.pdf [file 1600822_SM.pdf]

## Supplementary Materials for

### The hijacking of a receptor kinase–driven pathway by a wheat fungal pathogen leads to disease

Gongjun Shi, Zengcui Zhang, Timothy L. Friesen, Dina Raats, Tzion Fahima, Robert S. Brueggeman, Shunwen Lu, Harold N. Trick, Zhaohui Liu, Wun Chao, Zeev Frenkel, Steven S. Xu, Jack B. Rasmussen, Justin D. Faris

Published 26 October 2016, *Sci. Adv.* **2**, e1600822 (2016)

DOI: 10.1126/sciadv.1600822

#### This PDF file includes:

- fig. S1. Conserved domains and active sites identified in the deduced *Snn1* protein.
- fig. S2. An unrooted phylogenetic tree showing relationships between *Snn1* and other plant wall–associated receptor kinase (WAK) proteins.
- fig. S3. Deduced amino acid sequence alignment of mutants and informative lines.
- fig. S4. Transcription analysis of the splice site mutant CSems-6141.
- fig. S5. DNA blot analysis.
- fig. S6. DNA alignment of *Snn1* from chromosome 1B and its putative homoeoallele from chromosome 1D.
- fig. S7. Phylogenetic tree of 24 genotypes based on deduced amino acid sequences of the *Snn1* gene.
- fig. S8. Transcription analysis of *Snn1* in the durum wheat variety Lebsock.
- fig. S9. *TaMAPK3* transcription analysis after SnTox1 spray inoculation.
- fig. S10. Y2H assays showing that *Snn1* interacts with SnTox1 in a sequence-specific manner.
- table S1. PCR-based molecular markers used to anchor the CS chromosome 1BS BAC contig to the genetic linkage map containing the *Snn1* gene.
- table S2. PCR-based molecular markers developed for the seven candidate genes.
- table S3. Descriptions of induced mutations identified within the *Snn1* gene-coding region.
- table S4. Top five BLASTP hits in the NCBI nr database using the *Snn1* deduced amino acid sequence as a query.

- table S5. The 826 *Triticum* accessions and 123 *Ae. speltoides* accessions evaluated for the presence of the *Snn1* DNA sequence and/or for reaction to SnTox1.
- table S6. Primers used for sequencing of *Snn1* from genomic DNA.
- table S7. PCR primers used to amplify the *Snn1* cDNA fragments for sequencing.
- table S8. PCR primers used to amplify the *Snn1* cDNA 5' and 3' ends.
- table S9. PCR primers used for RQ-PCR analysis.
- table S10. PCR primers used for Y2H analysis.

## Supplementary Materials



**fig. S1. Conserved domains and active sites identified in the deduced Snn1 protein.** Red arrows indicate the insertion in the GUB-WAK domain of Snn1 with C1-C5 indicating the five conserved cysteine residues. Triangles indicate the active sites in the EGF\_CA and PKc domains (as determined in 1EMN and 1F3M\_C structures of the corresponding human proteins). Species abbreviations (followed by Genbank accession numbers): At, *Arabidopsis thaliana*; Gm, *Glycine max*; Hv, *Hordeum vulgare*; Hs, *Homo sapiens*; Mt, *Medicago truncatula*; Os, *Oryza sativa*; Sb, *Sorghum bicolor*; Sl, *Solanum lycopersicum*; Zm, *Zea mays*.



**fig. S2. An unrooted phylogenetic tree showing relationships between Snn1 and other plant wall-associated receptor kinase (WAK) proteins.** Plant WAKs fall into five (I-V) major groups, each contains exclusively monocot (bolded) or dicot species except for Group V which includes both. Group I, which includes Snn1 proteins from three different species (underlined) and the disease resistance protein ZmWAK (asterisk, 21), appears to be most diversified among the monocot groups. Note that Snn1 proteins and other monocot WAKs having an insertion within the galacturonan-binding (GUB\_WAK) domain form a subgroup (red text). WAK protein sequences were aligned using the CLUSTALX program ([/www.clustal.org](http://www.clustal.org)). Phylogenetic analysis was performed using the neighbor-joining method with the PHYLIP 3.61 package (<http://evolution.genetics.washington.edu/phylip.html>); bootstrapping values (>60%, from 1,000 replicates) are indicated on branches of major group. Species abbreviations (followed by Genbank accession numbers if any): Aes, *Aegilops speltoides*; Aet, *A. tauschii*; At, *Arabidopsis thaliana*; Bd, *Brachypodium distachyon*; Gm, *Glycine max*; Hv, *Hordeum vulgare*; Mt, *Medicago truncatula*; Os, *Oryza sativa*; Sb, *Sorghum bicolor*; Si, *Setaria italica* (foxtail millet); Le, *Lycopersicon esculentum*; Ta, *Triticum aestivum*; Tt, *T. turgidum* ssp. *dicoccoides*; Tu, *T. urartu*; Zm, *Zea mays*.

10 20 30 40 50 60 70 80 90 100  
Chinese Spring  
Langdon  
Altar84  
Hope  
Csmo-231  
Csmo-237  
Csmo-6107  
Csmo-6126  
Csmo-6125  
Csmo-6132  
Csmo-6133  
Csmo-6136  
Csmo-6140  
Csmo-6151  
Csmo-6155  
Csmo-6156  
Csmo-6159

110 120 130 140 150 160 170 180 190 200 210  
Chinese Spring  
Langdon  
Altar84  
Hope  
Csmo-231  
Csmo-237  
Csmo-6107  
Csmo-6126  
Csmo-6125  
Csmo-6132  
Csmo-6133  
Csmo-6136  
Csmo-6140  
Csmo-6151  
Csmo-6155  
Csmo-6156  
Csmo-6159

220 230 240 250 260 270 280 290 300 310  
Chinese Spring  
Langdon  
Altar84  
Hope  
Csmo-231  
Csmo-237  
Csmo-6107  
Csmo-6126  
Csmo-6125  
Csmo-6132  
Csmo-6133  
Csmo-6136  
Csmo-6140  
Csmo-6151  
Csmo-6155  
Csmo-6156  
Csmo-6159

320 330 340 350 360 370 380 390 400 410  
Chinese Spring  
Langdon  
Altar84  
Hope  
Csmo-231  
Csmo-237  
Csmo-6107  
Csmo-6126  
Csmo-6125  
Csmo-6132  
Csmo-6133  
Csmo-6136  
Csmo-6140  
Csmo-6151  
Csmo-6155  
Csmo-6156  
Csmo-6159

420 430 440 450 460 470 480 490 500 510 520  
Chinese Spring  
Langdon  
Altar84  
Hope  
Csmo-231  
Csmo-237  
Csmo-6107  
Csmo-6126  
Csmo-6125  
Csmo-6132  
Csmo-6133  
Csmo-6136  
Csmo-6140  
Csmo-6151  
Csmo-6155  
Csmo-6156  
Csmo-6159

530 540 550 560 570 580 590 600 610 620 630  
Chinese Spring  
Langdon  
Altar84  
Hope  
Csmo-231  
Csmo-237  
Csmo-6107  
Csmo-6126  
Csmo-6125  
Csmo-6132  
Csmo-6133  
Csmo-6136  
Csmo-6140  
Csmo-6151  
Csmo-6155  
Csmo-6156  
Csmo-6159

640 650 660 670 680 690 700 710 720 730  
Chinese Spring  
Langdon  
Altar84  
Hope  
Csmo-231  
Csmo-237  
Csmo-6107  
Csmo-6126  
Csmo-6125  
Csmo-6132  
Csmo-6133  
Csmo-6136  
Csmo-6140  
Csmo-6151  
Csmo-6155  
Csmo-6156  
Csmo-6159

**fig. S3. Deduced amino acid sequence alignment of mutants and informative lines.** Residues highlighted in green are known to not alter Snn1 function. Residues highlighted in red are known to alter Snn1 function. Residues highlighted in yellow are unknown if they alter function because they occur in mutants that have had two EMS-induced mutations. The predicted signal sequence, GUB\_WAK binding, EGF\_CA binding, transmembrane, and PKC domains are underlined in red, orange, blue, green, and purple, respectively.



**fig. S4. Transcription analysis of the splice site mutant CSems-6141.** cDNA of CS and CSems-6141 was amplified with primers 3ExonF3 and 600015R, which flank the point mutant in CSems-6141 at position 2056. The mutation occurred at the splice acceptor site of intron 2 resulting in the relocation of the splice site to position 2116 and a cDNA fragment 60 bp shorter than that in wild type CS.



### Probe FCG36

TGCGTCGATAGGAGTGAGTGTGTTGCGCGTGTATATATATATGAAAAAGCATCTACATCCATGATTTTTGCCTAT  
 TTACTTGTCATCCCGTCTATATATTAAGGGAGGGAGGATGTGCAGCCCAAGTTAGACGATTCCTTGCAACCTGCC  
AGACACGATAGAGGGAGTAGAGCAGCATCAGCACCCCAAATCCCAATTCCATTCCCACCCACTACTGCGGCTGT  
 GGTGCCAGTAATCCAAGTATCATCTTGGCCGCCGCGGCTGAGCAGCAGCAAGGTTGCCGTGACAAGTGGGCC  
 ACATCAGCATCCCCTTCCCTTTCGGCATCGGCCGCGGCTGCTCCGCCATGGCTTCGAGGTCGTGTGCAACGACT  
 CCTCGTATCCCCCTCGGCCTTCTTGTGCGAAAAGAATATCCAGGTTGTCGTCGTCCCCACTGGATCCCGAGA  
 ACGGGAGCGATTGGTCCCTTCTCGTCGATCGAGCTTGTGAGCATATCAGTCGCCACGGGCAAGGCACGGGTGTACG  
 CCCCCTCTCGTACCTCTGCAGCACAATCTCAACAGGACCTTCTCCGCGATCTACAATATTCACCTGGCCACA  
 CGCCGTTTCGCCGTGTCGGCGACGCGCAATATCTCGTCGGCGTCGGCTGGAGAGTCGATGCTTTCGTGACTTTCA  
 TCGACTTTCGCTGAGGTGGCCGTATACGGTCATGTTCCGCTGCAGTGTCTCGTGCACGCAATCTCCTGCCAAGTG  
 TGACCCCAACAACGGGTCGTGCACGGGGAGGGGCTGCTGCCACACCACCATCCACCGGACAACAACCTCGGCA  
 ACTTGTTAAGCTTTTCTGTCAAGGGCGAGGTCCCAACGAGCGGTGGGAAGACTACCCGTGCTCCTACGCCAT

**fig. S5. DNA blot analysis.** A probe was derived from the 5' UTR and 5' coding region of the *Snn1* gene and hybridized to DNA of the Chinese Spring nullisomic-tetrasomic lines, where a pair of missing chromosomes is compensated for by a pair of homoeologous chromosomes, digested with the restriction enzyme *Bam*HI. The absence of the fragment in the nullisomic 1B-tetrasomic 1D line indicates that fragment is specific to chromosome 1B. The probe sequence is shown below with the primer annealing sites are underlined, the 5' UTR shaded in blue, and the start codon shaded in green.



**fig. S6. DNA alignment of *Snn1* from chromosome 1B and its putative homoeoallele from chromosome 1D.** Identical nucleotides are shaded in grey. The *Snn1* start codon and the FGENESH-predicted start codon for the 1D copy are indicated in red boxes. The orange underline indicates *Snn1* exons, and the blue shading presents the sequence of the probe used for DNA blot analysis (fig. S5) (with the exception of the 5' UTR and 5' flanking region).



**fig. S7. Phylogenetic tree of 24 genotypes based on deduced amino acid sequences of the *Snn1* gene.** Genotypes sensitive to SnTox1 are highlighted in yellow. The gray highlight of Lebsock indicates that it is not transcribed (fig. S8). Reverse-transcription PCR experiments were conducted to verify that *Snn1* alleles from the remaining genotypes were transcribed (data not shown). The genus and species for each genotype is abbreviated where, for genus, “A.” and “T.” represent “*Aegilops*” and “*Triticum*”, respectively, and for species, “t.” and “a.” represent “*turgidum*” and “*aestivum*”, respectively. The ploidy level of each genotype is indicated in parenthesis. Two critical mutations leading to insensitive alleles can be deduced and are indicated by the blue arrows (also indicated in fig. S3).



**fig. S8. Transcription analysis of *Snn1* in the durum wheat variety Lebsock.** cDNA of Lebsock, Laidley and CS was amplified with primers 3ExonF4 and 600015R, which produced the 520 bp cDNA fragment in Laidley and CS but not in Lebsock (left), and with wheat *GAPDH* gene primers GAPDH.F152 and GAPDH.R338 (right). The absence of an *Snn1* amplicon in Lebsock indicated that the gene was not expressed.



**fig. S9. *TaMAPK3* transcription analysis after SnTox1 spray inoculation.** RQ-PCR evaluation of *TaMAPK3* expression was conducted in SnTox1-challenged plants; blue bars: SnTox1 sprayed inoculum; red bars: H<sub>2</sub>O sprayed; yellow bars: no spray.



**fig. S10. Y2H assays showing that Snn1 interacts with SnTox1 in a sequence-specific manner.** Snn1 and SnTox1 were expressed in yeast as the prey and the bait proteins, respectively. The Snn1 prey protein was expressed as full-length (minus signal peptide) or partial (with specific deletion) proteins as represented by the schematic drawings (numbers indicate the amino acid positions in the full-length Snn1 protein, GeneBank accession number KP091701). For Y2H assays, yeast cells (with 10-fold serial dilutions) co-expressing the prey/bait proteins were dropped onto agar plates containing interaction-dependent selective media (SD/-LTHA plus x- $\alpha$ -gal) (panels 1-14 on the right). Blue colorations indicate positive interactions. Panels 10-12 show the negative results when the bait protein was replaced with SnToxA. Panels 13 and 14 at bottom represent the standard positive (pRecT/p53) and negative (pRecT/pLam) controls. All yeast cells grew equally well on interaction-independent media (SD/-LT) (not shown). Note that a short fragment (140-aa, positions 158-297) between the GUB-WAKb and EGF domains (red bar) is sufficient to produce the blue coloration (compare panel 6 to panels 4, 5 and 7), suggesting that this extracellular region may contain residues specifically targeted by SnTox1.

**table S1. PCR-based molecular markers used to anchor the CS chromosome 1BS BAC contig to the genetic linkage map containing the *Snn1* gene.**

| Marker                      | Source                                 | CS survey sequence                                  | F primer                  | R primer                       | BAC(s) detected                                       |
|-----------------------------|----------------------------------------|-----------------------------------------------------|---------------------------|--------------------------------|-------------------------------------------------------|
| <i>Xfcp618</i>              | SSR from previous fine-mapping         | IWGSC_chr1BS_ab_k_71_contigs_longerthan_200_2053630 | TCTACATACGGACTGAAATGGATAC | GATTGAGACTCTGGTTACATAAGACTACTC | TaaCsp1BS027H03<br>TaaCsp1BS009M24                    |
| <i>X6A04</i>                | Survey sequence corresponding to BES   | IWGSC_chr1BS_ab_k_71_contigs_longerthan_200_3475551 | GACAGCACAAGACTCGGACA      | GTATCTCAAGCGGGGAACAA           | TaaCsp1BS095K24                                       |
| <i>X7O03</i>                | Survey sequence corresponding to BES   | IWGSC_chr1BS_ab_k_71_contigs_longerthan_200_3442698 | GGTCCTACCCGCTTCCTAAC      | GCGCTCTCTCCTATGATTGC           | TaaCsp1BS095K24<br>TaaCsp1BS007O03                    |
| <i>XBE49883</i><br><i>1</i> | EST-based STS from Reddy et al. (2008) | IWGSC_chr1BS_ab_k_71_contigs_longerthan_200_3440935 | ATTTTCAGGAGTTAGTGTCATGCTC | GTTAGTGTGCTTGGTAAAATTACGG      | TaaCsp1BS001M21<br>TaaCsp1BS018B09<br>TaaCsp1BS115G12 |
| <i>X73H08</i>               | Survey sequence corresponding to BES   | IWGSC_chr1BS_ab_k_71_contigs_longerthan_200_3446520 | GGAAGCGTTTCATGATCACC      | TCTAATCCCCCTCCACCTCT           | TaaCsp1BS073H08<br>TaaCsp1BS134D22                    |
| <i>X93D06</i>               | Survey sequence corresponding to BES   | IWGSC_chr1BS_ab_k_71_contigs_longerthan_200_3446364 | GCCGAGAAATGGAGGAAGCA      | GACATCACCGCCTCGCTCTT           | TaaCsp1BS002N12<br>TaaCsp1BS007P09                    |
| <i>Xfcp624</i>              | SSR from previous fine-mapping         | IWGSC_chr1BS_ab_k_71_contigs_longerthan_200_3433871 | GTGCTGCTAAATGGATTCCTAAGC  | CCAAACTGGCAAAAAGATTGAGC        | TaaCsp1BS060E11<br>TaaCsp1BS084J20                    |
| <i>X117L19</i>              | Survey sequence corresponding to BES   | IWGSC_chr1BS_ab_k_71_contigs_longerthan_200_3438216 | CAAATCCAAAGAATGCGACC      | CGGCTTTTAAATGACCCTTG           | TaaCsp1BS117L19<br>TaaCsp1BS094B15                    |
| <i>Xfcp619</i>              | SSR from previous fine-mapping         | IWGSC_chr1BS_ab_k_71_contigs_longerthan_200_3482199 | TTGAAAATCTGAAGCCCCCAG     | TCCGCAAAAATGTTCCACTCAC         | TaaCsp1BS121D11<br>TaaCsp1BS046E02<br>TaaCsp1BS130O13 |
| <i>X130O13</i>              | Survey sequence corresponding to BES   | IWGSC_chr1BS_ab_k_71_contigs_longerthan_200_3445768 | AGGGACAAGCTTTTTTCGGAC     | CATGAATGCGAAAGACCAGA           | TaaCsp1BS130O13                                       |
| <i>X28G13</i>               | ISBP from BES                          | IWGSC_chr1BS_ab_k_71_contigs_longerthan_200_3461863 | GTGCAGTGGGGCTAACAAAT      | TTCATGTATTGCTTGTCACATCA        | TaaCsp1BS028G139                                      |

**table S2. PCR-based molecular markers developed for the seven candidate genes.**

| Marker          | Predicted protein <sup>a</sup>       | CS survey sequence                                 | F primer             | R primer             | BAC(s)                             |
|-----------------|--------------------------------------|----------------------------------------------------|----------------------|----------------------|------------------------------------|
| <i>X3446364</i> | HCBP pathogenesis protein-like       | IWGSC_chr1BS_ab_k71_contigs_longerthan_200_3446364 | GCACCCATGAACTCCTCATC | GGTTCGACGTGTATGGGAAC | TaaCsp1BS002N12<br>TaaCsp1BS007P09 |
| <i>X500019</i>  | Leucine rich-repeat receptor-like    | IWGSC_chr1BS_ab_k71_contigs_longerthan_200_3483553 | AGGTTGACAAAGCGCTCAAT | CTACAATCCGAGCATCAGCA | TaaCsp1BS134D22<br>TaaCsp1BS106C02 |
| <i>X3476283</i> | Wall-associated kinase               | IWGSC_chr1BS_ab_k71_contigs_longerthan_200_3476283 | ATGGCGTAGGAGCACGGGTA | TGCGTCGATAGGAGTGAGTG | TaaCsp1BS134D22                    |
| <i>X3446520</i> | RPP8-like                            | IWGSC_chr1BS_ab_k71_contigs_longerthan_200_3446520 | AGCACCGAGCTTGATTCTGT | ATCCGATGCTCTCTGCTCAT | TaaCsp1BS134D22                    |
| <i>X600041</i>  | Serine/threonine protein kinase-like | IWGSC_chr1BS_ab_k71_contigs_longerthan_200_3446520 | CCGGAAAAACCACTTTGTGT | GACCGTCGGATTGATTTTG  | TaaCsp1BS134D22                    |
| <i>X600222</i>  | S-receptor-like                      | IWGSC_chr1BS_ab_k71_contigs_longerthan_200_3482641 | CTTAATCCGGGCATGTTGAA | TCTGACTCCTTGCAATCTCG | TaaCsp1BS073H08<br>TaaCsp1BS134D22 |
| <i>X600110</i>  | NB-LRR-like                          | IWGSC_chr1BS_ab_k71_contigs_longerthan_200_3457459 | AGCAGAGCAACCTTTGGTGT | CGGGCGTAAGATTTGACAAT | TaaCsp1BS073H08<br>TaaCsp1BS134D22 |

<sup>a</sup>Based on BLASTx searches of the NCBI nr database.

**table S3. Descriptions of induced mutations identified within the *Snn1* gene-coding region.**

| Induced mutant          | Mutation type | Position <sup>a</sup> | Exon     | Major domain | Codon change    | Amino acid change |
|-------------------------|---------------|-----------------------|----------|--------------|-----------------|-------------------|
| CSems-231               | Missense      | 119                   | 1        | GUB_WAK      | TGC→TAC         | Cys→Tyr           |
| CSems-237               | Missense      | 149                   | 1        | GUB_WAK      | GGC→GAC         | Gly→Asp           |
| CSems-6107              | Missense      | 2,611                 | 3        | PKc          | CTC→TTC         | Leu→Phe           |
| CSems-6125              | Nonsense      | 988                   | 1        | EGF_CA       | CAA→TAA         | Glu→stop          |
| CSems-6126              | Missense      | 2,556                 | 3        | PKc          | ATG→ATA         | Met→Ile           |
| CSems-6128              | Missense      | 440                   | 1        | GUB_WAK      | TCG→TTG         | Ser→Leu           |
| CSems-6131              | Missense      | 478                   | 1        | None         | GTC→ATC         | Val→Ile           |
| CSems-6132              | Missense      | 2,326                 | 3        | PKc          | GAG→AAG         | Glu→Lys           |
| CSems-6133              | Missense      | 460/2,536             | 1/3      | GUB_WAK/PKc  | GTC→ATC/GCG→ACG | Val→Ile/Ala→Thr   |
| CSems-6136              | Missense      | 2,584                 | 3        | PKc          | CAT→TAT         | His→Tyr           |
| CSems-6140              | Missense      | 2,228/2,761           | 3/3      | PKc/PKc      | AGT→AAT/GAT→AAT | Ser→Asn/Asp→Asn   |
| CSems-6141 <sup>b</sup> | Splice        | 2056                  | Intron 2 |              |                 |                   |
| CSems-6151              | Missense      | 149                   | 1        | GUB_WAK      | GGC→GAC         | Gly→Asp           |
| CSems-6155              | Missense      | 2,556                 | 3        | PKc          | ATG→ATA         | Met→Ile           |
| CSems-6156              | Missense      | 2,556/2,777           | 3/3      | PKc/PKc      | ATG→ATA/GGA→GAA | Met→Ile/Gly→Glu   |
| CSems-6159              | Missense      | 2,342                 | 3        | PKc          | GCA→GTA         | Ala→Val           |

<sup>a</sup>Nucleotide position from the start codon.

<sup>b</sup>The mutation in CSems-6141 occurred at the splice acceptor site of intron 2. RT-PCR and sequence analysis indicated that the splice mutation in CSems-6141 results in a product 60 bp shorter than that in the wild type (see fig. S4).

**table S4. Top five BLASTP hits in the NCBI nr database using the *Snn1* deduced amino acid sequence as a query.**

| Accession  | Description                                                       | Score | e-value | Query coverage | Identity |
|------------|-------------------------------------------------------------------|-------|---------|----------------|----------|
| EMT17650.1 | Wall-associated receptor kinase 1<br>( <i>Aegilops tauschii</i> ) | 927   | 0.0     | 91%            | 71%      |
| EMT31693.1 | Wall-associated receptor kinase 1<br>( <i>Aegilops tauschii</i> ) | 925   | 0.0     | 99%            | 70%      |
| EMS57881.1 | Wall-associated receptor kinase 1<br>( <i>Triticum urartu</i> )   | 907   | 0.0     | 97%            | 65%      |
| EMT16317.1 | Wall-associated receptor kinase 1<br>( <i>Aegilops tauschii</i> ) | 904   | 0.0     | 99%            | 65%      |
| EMT29999.1 | Wall-associated receptor kinase 4<br>( <i>Aegilops tauschii</i> ) | 871   | 0.0     | 99%            | 65%      |

**table S5. The 826 *Triticum* accessions and 123 *Ae. speltoides* accessions evaluated for the presence of the *Snn1* DNA sequence and/or for reaction to SnTox1.**

| Accession <sup>a</sup> | PI/Citr    | Ploidy | Genus           | Species         | Subspecies           | SnTox1 <sup>b</sup> | <i>Snn1</i> <sup>c</sup> |
|------------------------|------------|--------|-----------------|-----------------|----------------------|---------------------|--------------------------|
| 52                     | Citr 8610  | 6X     | <i>Triticum</i> | <i>aestivum</i> | <i>sphaerococcum</i> | +                   | +                        |
| 132                    | PI 42014   | 6X     | <i>Triticum</i> | <i>aestivum</i> | <i>sphaerococcum</i> | +                   | +                        |
| 219                    | PI 70711   | 6X     | <i>Triticum</i> | <i>aestivum</i> | <i>sphaerococcum</i> | +                   | +                        |
| 971                    | PI 278650  | 6X     | <i>Triticum</i> | <i>aestivum</i> | <i>sphaerococcum</i> | +                   | +                        |
| 6B365                  | NA         | 6X     | <i>Triticum</i> | <i>aestivum</i> | <i>aestivum</i>      | -                   | +                        |
| 6B662                  | NA         | 6X     | <i>Triticum</i> | <i>aestivum</i> | <i>aestivum</i>      | -                   | -                        |
| Alsen                  | NA         | 6X     | <i>Triticum</i> | <i>aestivum</i> | <i>aestivum</i>      | -                   | +                        |
| Amelio                 | NA         | 6X     | <i>Triticum</i> | <i>aestivum</i> | <i>aestivum</i>      | -                   | -                        |
| <b>Amery</b>           | NA         | 6X     | <i>Triticum</i> | <i>aestivum</i> | <i>aestivum</i>      | -                   | +                        |
| Arina                  | NA         | 6X     | <i>Triticum</i> | <i>aestivum</i> | <i>aestivum</i>      | -                   | -                        |
| Atlas 66               | Citr 12561 | 6X     | <i>Triticum</i> | <i>aestivum</i> | <i>aestivum</i>      | -                   | -                        |
| Bobwhite               | PI 520554  | 6X     | <i>Triticum</i> | <i>aestivum</i> | <i>aestivum</i>      | -                   | -                        |
| Bola Blanca            | PI 25970   | 6X     | <i>Triticum</i> | <i>aestivum</i> | <i>compactum</i>     | +                   | +                        |
| Boston                 | NA         | 6X     | <i>Triticum</i> | <i>aestivum</i> | <i>aestivum</i>      | -                   | -                        |
| Boval                  | NA         | 6X     | <i>Triticum</i> | <i>aestivum</i> | <i>aestivum</i>      | -                   | -                        |
| BR34                   | NA         | 6X     | <i>Triticum</i> | <i>aestivum</i> | <i>aestivum</i>      | -                   | +                        |
| Briggs                 | PI 632970  | 6X     | <i>Triticum</i> | <i>aestivum</i> | <i>aestivum</i>      | -                   | -                        |
| Bulk 84-4-12           | PI 519204  | 6X     | <i>Triticum</i> | <i>aestivum</i> | <i>aestivum</i>      | -                   | -                        |
| Capnord                | PI 324529  | 6X     | <i>Triticum</i> | <i>aestivum</i> | <i>aestivum</i>      | -                   | -                        |
| Certo                  | NA         | 6X     | <i>Triticum</i> | <i>aestivum</i> | <i>aestivum</i>      | -                   | -                        |
| Cheyenne               | PI 192268  | 6X     | <i>Triticum</i> | <i>aestivum</i> | <i>aestivum</i>      | -                   | -                        |
| <b>Chinese Spring</b>  | Citr 14108 | 6X     | <i>Triticum</i> | <i>aestivum</i> | <i>aestivum</i>      | +                   | +                        |
| Dapps                  | PI 633862  | 6X     | <i>Triticum</i> | <i>aestivum</i> | <i>aestivum</i>      | -                   | +                        |
| <b>DN2378</b>          | PI 361862  | 6X     | <i>Triticum</i> | <i>aestivum</i> | <i>macha</i>         | +                   | +                        |
| Erik                   | PI 476849  | 6X     | <i>Triticum</i> | <i>aestivum</i> | <i>aestivum</i>      | -                   | +                        |
| Fielder                | Citr 17268 | 6X     | <i>Triticum</i> | <i>aestivum</i> | <i>aestivum</i>      | -                   | +                        |
| Forno                  | NA         | 6X     | <i>Triticum</i> | <i>aestivum</i> | <i>aestivum</i>      | -                   | +                        |
| FR 85-6                | PI 520525  | 6X     | <i>Triticum</i> | <i>aestivum</i> | <i>aestivum</i>      | -                   | -                        |
| <b>G532</b>            | PI 428146  | 6X     | <i>Triticum</i> | <i>aestivum</i> | <i>macha</i>         | +                   | +                        |

|                  |            |    |                 |                 |                      |   |   |
|------------------|------------|----|-----------------|-----------------|----------------------|---|---|
| Genial           | PI 573751  | 6X | <i>Triticum</i> | <i>aestivum</i> | <i>aestivum</i>      | - | - |
| Glenlea          | CItr 17272 | 6X | <i>Triticum</i> | <i>aestivum</i> | <i>aestivum</i>      | - | - |
| Glenn            | PI 639273  | 6X | <i>Triticum</i> | <i>aestivum</i> | <i>aestivum</i>      | - | - |
| Regent           | PI 234831  | 6X | <i>Triticum</i> | <i>aestivum</i> | <i>aestivum</i>      | - | + |
| <b>Grandin</b>   | PI 531005  | 6X | <i>Triticum</i> | <i>aestivum</i> | <i>aestivum</i>      | - | + |
| Granger          | PI 636134  | 6X | <i>Triticum</i> | <i>aestivum</i> | <i>aestivum</i>      | - | - |
| Hanna            | NA         | 6X | <i>Triticum</i> | <i>aestivum</i> | <i>aestivum</i>      | - | - |
| <b>Hope</b>      | CItr 8178  | 6X | <i>Triticum</i> | <i>aestivum</i> | <i>aestivum</i>      | - | + |
| I12              | PI 83402   | 6X | <i>Triticum</i> | <i>aestivum</i> | <i>sphaerococcum</i> | - | - |
| Jagger           | PI 593688  | 6X | <i>Triticum</i> | <i>aestivum</i> | <i>aestivum</i>      | - | + |
| Katepwa          | NA         | 6X | <i>Triticum</i> | <i>aestivum</i> | <i>aestivum</i>      | - | - |
| Knudson          | NA         | 6X | <i>Triticum</i> | <i>aestivum</i> | <i>aestivum</i>      | - | + |
| KS96WGRC39       | PI 604224  | 6X | <i>Triticum</i> | <i>aestivum</i> | <i>aestivum</i>      | - | - |
| Kulm             | PI 590576  | 6X | <i>Triticum</i> | <i>aestivum</i> | <i>aestivum</i>      | - | - |
| Largo            | CItr 17895 | 6X | <i>Triticum</i> | <i>aestivum</i> | synthetic            | - | + |
| Larned           | CItr 17650 | 6X | <i>Triticum</i> | <i>aestivum</i> | <i>aestivum</i>      | - | - |
| W-7976           | NA         | 6X | <i>Triticum</i> | <i>aestivum</i> | synthetic            | + | + |
| W-7984           | NA         | 6X | <i>Triticum</i> | <i>aestivum</i> | synthetic            | + | + |
| Maris Huntsman   | PI 404008  | 6X | <i>Triticum</i> | <i>aestivum</i> | <i>aestivum</i>      | - | + |
| Mironovskaja 808 | PI 410430  | 6X | <i>Triticum</i> | <i>aestivum</i> | <i>aestivum</i>      | - | + |
| Mocho de Espiga  | PI 56213   | 6X | <i>Triticum</i> | <i>aestivum</i> | <i>compactum</i>     | + | + |
| Quadrada         |            |    |                 |                 |                      |   |   |
| Moisson          | PI 315998  | 6X | <i>Triticum</i> | <i>aestivum</i> | <i>aestivum</i>      | - | - |
| ND495            | NA         | 6X | <i>Triticum</i> | <i>aestivum</i> | <i>aestivum</i>      | + | + |
| Newton           | CItr 17715 | 6X | <i>Triticum</i> | <i>aestivum</i> | <i>aestivum</i>      | - | - |
| Norstar          | CItr 17735 | 6X | <i>Triticum</i> | <i>aestivum</i> | <i>aestivum</i>      | - | - |
| Novo             | NA         | 6X | <i>Triticum</i> | <i>aestivum</i> | <i>aestivum</i>      | - | + |
| Oklee            | PI 634553  | 6X | <i>Triticum</i> | <i>aestivum</i> | <i>aestivum</i>      | - | - |
| Opata 85         | PI 591776  | 6X | <i>Triticum</i> | <i>aestivum</i> | <i>aestivum</i>      | - | + |
| Orpic            | NA         | 6X | <i>Triticum</i> | <i>aestivum</i> | <i>aestivum</i>      | - | - |
| Parshall         | PI 613587  | 6X | <i>Triticum</i> | <i>aestivum</i> | <i>aestivum</i>      | - | - |
| Pavon F76        | PI 519847  | 6X | <i>Triticum</i> | <i>aestivum</i> | <i>aestivum</i>      | - | + |
| Pitoma           | NA         | 6X | <i>Triticum</i> | <i>aestivum</i> | <i>aestivum</i>      | - | - |
| Puseas           | NA         | 6X | <i>Triticum</i> | <i>aestivum</i> | <i>aestivum</i>      | - | + |

|                     |            |    |                 |                 |                      |   |   |
|---------------------|------------|----|-----------------|-----------------|----------------------|---|---|
| <b>Red Egyptian</b> | PI 45403   | 6X | <i>Triticum</i> | <i>aestivum</i> | <i>aestivum</i>      | + | + |
| Renan               | PI 564569  | 6X | <i>Triticum</i> | <i>aestivum</i> | <i>aestivum</i>      | - | + |
| Roazon              | PI 422330  | 6X | <i>Triticum</i> | <i>aestivum</i> | <i>aestivum</i>      | + | + |
| Rurik               | NA         | 6X | <i>Triticum</i> | <i>aestivum</i> | <i>aestivum</i>      | + | + |
| Salamouni           | PI 182673  | 6X | <i>Triticum</i> | <i>aestivum</i> | <i>aestivum</i>      | + | + |
| Sardona             | NA         | 6X | <i>Triticum</i> | <i>aestivum</i> | <i>aestivum</i>      | - | + |
| Selkirk             | CItr 13100 | 6X | <i>Triticum</i> | <i>aestivum</i> | <i>aestivum</i>      | - | - |
| Sinai No. 3         | PI 60740   | 6X | <i>Triticum</i> | <i>aestivum</i> | <i>compactum</i>     | + | + |
| Skater              | NA         | 6X | <i>Triticum</i> | <i>aestivum</i> | <i>aestivum</i>      | - | - |
| Steele-ND           | PI 634981  | 6X | <i>Triticum</i> | <i>aestivum</i> | <i>aestivum</i>      | - | + |
| Sumai3              | PI 481542  | 6X | <i>Triticum</i> | <i>aestivum</i> | <i>aestivum</i>      | - | + |
| P78-81-1            | NA         | 6X | <i>Triticum</i> | <i>aestivum</i> | <i>spelta</i>        | - | - |
| Sears407a           | NA         | 6X | <i>Triticum</i> | <i>aestivum</i> | <i>spelta</i>        | - | - |
| TA4152-19           | NA         | 6X | <i>Triticum</i> | <i>aestivum</i> | synthetic            | + | + |
| TA4152-37           | NA         | 6X | <i>Triticum</i> | <i>aestivum</i> | synthetic            | + | + |
| TA4152-60           | NA         | 6X | <i>Triticum</i> | <i>aestivum</i> | synthetic            | + | + |
| TAM105              | CItr 17826 | 6X | <i>Triticum</i> | <i>aestivum</i> | <i>aestivum</i>      | - | + |
| Tapidor             | NA         | 6X | <i>Triticum</i> | <i>aestivum</i> | <i>aestivum</i>      | - | - |
| Termok              | PI41023    | 6X | <i>Triticum</i> | <i>aestivum</i> | <i>compactum</i>     | + | + |
| Terza               | NA         | 6X | <i>Triticum</i> | <i>aestivum</i> | <i>aestivum</i>      | - | - |
| <b>Timstein</b>     | PI 168688  | 6X | <i>Triticum</i> | <i>aestivum</i> | <i>aestivum</i>      | - | + |
| Tincurrin           | PI 434642  | 6X | <i>Triticum</i> | <i>aestivum</i> | <i>compactum</i>     | - | - |
| Type No. 5          | PI 40942   | 6X | <i>Triticum</i> | <i>aestivum</i> | <i>sphaerococcum</i> | + | + |
| UC1041GPC           | NA         | 6X | <i>Triticum</i> | <i>aestivum</i> | <i>aestivum</i>      | - | + |
| VPM 1               | NA         | 6X | <i>Triticum</i> | <i>aestivum</i> | <i>aestivum</i>      | + | + |
| WA7690              | PI 597665  | 6X | <i>Triticum</i> | <i>aestivum</i> | <i>aestivum</i>      | - | + |
| Zenith              | NA         | 6X | <i>Triticum</i> | <i>aestivum</i> | <i>aestivum</i>      | - | - |
| TA2601              | NA         | 6X | <i>Triticum</i> | <i>aestivum</i> | <i>compactum</i>     | + | + |
| LDN-2377syn         | NA         | 6X | <i>Triticum</i> | <i>aestivum</i> | synthetic            | - | + |
| Rescue              | CItr 12435 | 6X | <i>Triticum</i> | <i>aestivum</i> | <i>aestivum</i>      | - | - |
| Ching Feng          | NA         | 6X | <i>Triticum</i> | <i>aestivum</i> | <i>aestivum</i>      | - | - |
| Siu Mak             | NA         | 6X | <i>Triticum</i> | <i>aestivum</i> | <i>aestivum</i>      | - | + |
| Huguenot            | CItr 5122  | 4X | <i>Triticum</i> | <i>turgidum</i> | <i>durum</i>         | + | + |
| Doubbi              | CItr 13711 | 4X | <i>Triticum</i> | <i>turgidum</i> | <i>durum</i>         | - | - |

|                       |            |    |                 |                 |              |   |    |
|-----------------------|------------|----|-----------------|-----------------|--------------|---|----|
| <b>Laidley</b>        | PI 67342   | 4X | <i>Triticum</i> | <i>turgidum</i> | <i>durum</i> | + | +  |
| 2012 M65              | PI 316080  | 4X | <i>Triticum</i> | <i>turgidum</i> | <i>durum</i> | + | +  |
| 2013 M65              | PI 316082  | 4X | <i>Triticum</i> | <i>turgidum</i> | <i>durum</i> | + | NA |
| 2016 M65              | PI 316083  | 4X | <i>Triticum</i> | <i>turgidum</i> | <i>durum</i> | + | NA |
| 12:61-8T-5T-2aT-2B-2T | PI 324929  | 4X | <i>Triticum</i> | <i>turgidum</i> | <i>durum</i> | + | +  |
| Durati                | PI 434645  | 4X | <i>Triticum</i> | <i>turgidum</i> | <i>durum</i> | + | +  |
| Timor                 | PI 191645  | 4X | <i>Triticum</i> | <i>turgidum</i> | <i>durum</i> | - | +  |
| D 73121               | PI 519759  | 4X | <i>Triticum</i> | <i>turgidum</i> | <i>durum</i> | - | +  |
| FHB4512               | CItr 5094  | 4X | <i>Triticum</i> | <i>turgidum</i> | <i>durum</i> | - | +  |
| Tulatai Maitai        | PI 70658   | 4X | <i>Triticum</i> | <i>turgidum</i> | <i>durum</i> | - | NA |
| 2912                  | PI 74830   | 4X | <i>Triticum</i> | <i>turgidum</i> | <i>durum</i> | - | NA |
| N-85                  | PI 79900   | 4X | <i>Triticum</i> | <i>turgidum</i> | <i>durum</i> | - | +  |
| China 34              | PI 283853  | 4X | <i>Triticum</i> | <i>turgidum</i> | <i>durum</i> | + | +  |
| Rascon 37             | NA         | 4X | <i>Triticum</i> | <i>turgidum</i> | <i>durum</i> | + | +  |
| Aconchi 89            | PI 591761  | 4X | <i>Triticum</i> | <i>turgidum</i> | <i>durum</i> | + | +  |
| Agamia                | NA         | 4X | <i>Triticum</i> | <i>turgidum</i> | <i>durum</i> | + | +  |
| Ajaia 9               | NA         | 4X | <i>Triticum</i> | <i>turgidum</i> | <i>durum</i> | - | +  |
| <b>Altar 84</b>       | NA         | 4X | <i>Triticum</i> | <i>turgidum</i> | <i>durum</i> | + | +  |
| Araos                 | NA         | 4X | <i>Triticum</i> | <i>turgidum</i> | <i>durum</i> | + | +  |
| Botno                 | CItr 17283 | 4X | <i>Triticum</i> | <i>turgidum</i> | <i>durum</i> | - | NA |
| Chen 7                | NA         | 4X | <i>Triticum</i> | <i>turgidum</i> | <i>durum</i> | + | +  |
| Croc 1                | NA         | 4X | <i>Triticum</i> | <i>turgidum</i> | <i>durum</i> | + | +  |
| Decoy 1               | NA         | 4X | <i>Triticum</i> | <i>turgidum</i> | <i>durum</i> | - | NA |
| Dverd 2               | NA         | 4X | <i>Triticum</i> | <i>turgidum</i> | <i>durum</i> | + | +  |
| Falcin 1              | NA         | 4X | <i>Triticum</i> | <i>turgidum</i> | <i>durum</i> | + | +  |
| Gan                   | NA         | 4X | <i>Triticum</i> | <i>turgidum</i> | <i>durum</i> | + | +  |
| Green 3               | NA         | 4X | <i>Triticum</i> | <i>turgidum</i> | <i>durum</i> | + | NA |
| Kapude 1              | NA         | 4X | <i>Triticum</i> | <i>turgidum</i> | <i>durum</i> | + | +  |
| Laru                  | NA         | 4X | <i>Triticum</i> | <i>turgidum</i> | <i>durum</i> | - | NA |
| Scaup                 | NA         | 4X | <i>Triticum</i> | <i>turgidum</i> | <i>durum</i> | + | +  |
| Scoop 1               | NA         | 4X | <i>Triticum</i> | <i>turgidum</i> | <i>durum</i> | + | +  |
| Shag 22               | NA         | 4X | <i>Triticum</i> | <i>turgidum</i> | <i>durum</i> | + | +  |
| Sora                  | PI 173460  | 4X | <i>Triticum</i> | <i>turgidum</i> | <i>durum</i> | + | +  |

|                        |            |    |                 |                 |              |   |    |
|------------------------|------------|----|-----------------|-----------------|--------------|---|----|
| Sterna – DW            | NA         | 4X | <i>Triticum</i> | <i>turgidum</i> | <i>durum</i> | + | +  |
| Trinakria              | PI 428465  | 4X | <i>Triticum</i> | <i>turgidum</i> | <i>durum</i> | + | +  |
| Yar                    | NA         | 4X | <i>Triticum</i> | <i>turgidum</i> | <i>durum</i> | + | NA |
| Anedj                  | PI 306640  | 4X | <i>Triticum</i> | <i>turgidum</i> | <i>durum</i> | - | -  |
| Bidi 17                | PI 306641  | 4X | <i>Triticum</i> | <i>turgidum</i> | <i>durum</i> | + | +  |
| D 115                  | PI 306642  | 4X | <i>Triticum</i> | <i>turgidum</i> | <i>durum</i> | + | +  |
| D211                   | PI 306647  | 4X | <i>Triticum</i> | <i>turgidum</i> | <i>durum</i> | + | +  |
| D304                   | PI 306648  | 4X | <i>Triticum</i> | <i>turgidum</i> | <i>durum</i> | - | -  |
| Giorgio 331            | CItr 15108 | 4X | <i>Triticum</i> | <i>turgidum</i> | <i>durum</i> | + | +  |
| Lumillo                | PI 5996    | 4X | <i>Triticum</i> | <i>turgidum</i> | <i>durum</i> | + | +  |
| Farro Lungo            | PI 157969  | 4X | <i>Triticum</i> | <i>turgidum</i> | <i>durum</i> | - | NA |
| Cotrone                | PI 157975  | 4X | <i>Triticum</i> | <i>turgidum</i> | <i>durum</i> | - | +  |
| Vallelunga Glabra      | PI 157979  | 4X | <i>Triticum</i> | <i>turgidum</i> | <i>durum</i> | + | +  |
| Castiglione Pubescente | PI 157981  | 4X | <i>Triticum</i> | <i>turgidum</i> | <i>durum</i> | + | +  |
| Cappelli               | PI 264949  | 4X | <i>Triticum</i> | <i>turgidum</i> | <i>durum</i> | + | +  |
| Gerardo 624            | PI 367224  | 4X | <i>Triticum</i> | <i>turgidum</i> | <i>durum</i> | - | NA |
| Vallega Zitelli 611    | PI 367240  | 4X | <i>Triticum</i> | <i>turgidum</i> | <i>durum</i> | + | NA |
| Sincape 90             | PI 422297  | 4X | <i>Triticum</i> | <i>turgidum</i> | <i>durum</i> | + | +  |
| <b>Langdon</b>         | NA         | 4X | <i>Triticum</i> | <i>turgidum</i> | <i>durum</i> | - | +  |
| Dilse                  | NA         | 4X | <i>Triticum</i> | <i>turgidum</i> | <i>durum</i> | + | +  |
| Grande Dora            | NA         | 4X | <i>Triticum</i> | <i>turgidum</i> | <i>durum</i> | + | +  |
| Wales                  | NA         | 4X | <i>Triticum</i> | <i>turgidum</i> | <i>durum</i> | + | +  |
| Westhope               | NA         | 4X | <i>Triticum</i> | <i>turgidum</i> | <i>durum</i> | + | NA |
| DG Star                | NA         | 4X | <i>Triticum</i> | <i>turgidum</i> | <i>durum</i> | + | +  |
| DG Max                 | NA         | 4X | <i>Triticum</i> | <i>turgidum</i> | <i>durum</i> | + | NA |
| Ben                    | NA         | 4X | <i>Triticum</i> | <i>turgidum</i> | <i>durum</i> | - | +  |
| <b>Lebsock</b>         | NA         | 4X | <i>Triticum</i> | <i>turgidum</i> | <i>durum</i> | - | +  |
| <b>Maier</b>           | NA         | 4X | <i>Triticum</i> | <i>turgidum</i> | <i>durum</i> | + | +  |
| Alkabo                 | NA         | 4X | <i>Triticum</i> | <i>turgidum</i> | <i>durum</i> | + | +  |
| Grenora                | NA         | 4X | <i>Triticum</i> | <i>turgidum</i> | <i>durum</i> | - | NA |
| Divide                 | NA         | 4X | <i>Triticum</i> | <i>turgidum</i> | <i>durum</i> | - | +  |
| Mountrail              | NA         | 4X | <i>Triticum</i> | <i>turgidum</i> | <i>durum</i> | + | +  |
| Pierce                 | NA         | 4X | <i>Triticum</i> | <i>turgidum</i> | <i>durum</i> | - | +  |
| Erythromelan           | PI 274671  | 4X | <i>Triticum</i> | <i>turgidum</i> | <i>durum</i> | + | +  |

|                    |            |    |                 |                 |                 |   |    |
|--------------------|------------|----|-----------------|-----------------|-----------------|---|----|
| Hordeiforme I      | PI 274672  | 4X | <i>Triticum</i> | <i>turgidum</i> | <i>durum</i>    | - | NA |
| Hordeiforme II     | PI 274673  | 4X | <i>Triticum</i> | <i>turgidum</i> | <i>durum</i>    | - | NA |
| Leucomelan Biskrei | PI 274675  | 4X | <i>Triticum</i> | <i>turgidum</i> | <i>durum</i>    | - | -  |
| Muriciense         | PI 274681  | 4X | <i>Triticum</i> | <i>turgidum</i> | <i>durum</i>    | - | -  |
| ICM314             | CItr 3984  | 4X | <i>Triticum</i> | <i>turgidum</i> | <i>durum</i>    | + | +  |
| Medeah             | PI 41035   | 4X | <i>Triticum</i> | <i>turgidum</i> | <i>durum</i>    | + | +  |
| Realforte          | PI 41038   | 4X | <i>Triticum</i> | <i>turgidum</i> | <i>durum</i>    | + | NA |
| Lenah Khetifa      | PI 41039   | 4X | <i>Triticum</i> | <i>turgidum</i> | <i>durum</i>    | + | NA |
| Mahmoudi Ag        | PI 41046   | 4X | <i>Triticum</i> | <i>turgidum</i> | <i>durum</i>    | + | +  |
| Allemand           | PI 41049   | 4X | <i>Triticum</i> | <i>turgidum</i> | <i>durum</i>    | + | NA |
| Berbern            | PI 41050   | 4X | <i>Triticum</i> | <i>turgidum</i> | <i>durum</i>    | + | NA |
| Souri              | PI 41051   | 4X | <i>Triticum</i> | <i>turgidum</i> | <i>durum</i>    | + | +  |
| Sceptre            | PI 584833  | 4X | <i>Triticum</i> | <i>turgidum</i> | <i>durum</i>    | - | -  |
| Rusty              | PI 639869  | 4X | <i>Triticum</i> | <i>turgidum</i> | <i>durum</i>    | - | +  |
| Iumillo            | PI 210973  | 4X | <i>Triticum</i> | <i>turgidum</i> | <i>durum</i>    | + | NA |
| <b>Golden Ball</b> | CItr 11477 | 4X | <i>Triticum</i> | <i>turgidum</i> | <i>durum</i>    | + | +  |
| Cotrone            | PI 294571  | 4X | <i>Triticum</i> | <i>turgidum</i> | <i>durum</i>    | - | +  |
| <b>Kronos</b>      | NA         | 4X | <i>Triticum</i> | <i>turgidum</i> | <i>durum</i>    | + | +  |
| Tdom1              | CItr 3686  | 4X | <i>Triticum</i> | <i>turgidum</i> | <i>dicoccum</i> | - | -  |
| Tdom2              | CItr 4013  | 4X | <i>Triticum</i> | <i>turgidum</i> | <i>dicoccum</i> | - | -  |
| Tdom3              | CItr 7685  | 4X | <i>Triticum</i> | <i>turgidum</i> | <i>dicoccum</i> | - | +  |
| Tdom4              | CItr 7686  | 4X | <i>Triticum</i> | <i>turgidum</i> | <i>dicoccum</i> | - | +  |
| Tdom5              | CItr 7687  | 4X | <i>Triticum</i> | <i>turgidum</i> | <i>dicoccum</i> | - | +  |
| Tdom6              | CItr 7779  | 4X | <i>Triticum</i> | <i>turgidum</i> | <i>dicoccum</i> | - | -  |
| Tdom7              | CItr 7962  | 4X | <i>Triticum</i> | <i>turgidum</i> | <i>dicoccum</i> | - | -  |
| Tdom8              | CItr 7966  | 4X | <i>Triticum</i> | <i>turgidum</i> | <i>dicoccum</i> | - | -  |
| Tdom9              | CItr 12213 | 4X | <i>Triticum</i> | <i>turgidum</i> | <i>dicoccum</i> | - | +  |
| <b>Tdom10</b>      | CItr 12214 | 4X | <i>Triticum</i> | <i>turgidum</i> | <i>dicoccum</i> | - | +  |
| Tdom11             | CItr 14085 | 4X | <i>Triticum</i> | <i>turgidum</i> | <i>dicoccum</i> | - | -  |
| Tdom12             | CItr 14086 | 4X | <i>Triticum</i> | <i>turgidum</i> | <i>dicoccum</i> | - | -  |
| Tdom13             | CItr 14098 | 4X | <i>Triticum</i> | <i>turgidum</i> | <i>dicoccum</i> | - | -  |
| Tdom14             | CItr 14133 | 4X | <i>Triticum</i> | <i>turgidum</i> | <i>dicoccum</i> | - | -  |
| Tdom15             | CItr 14135 | 4X | <i>Triticum</i> | <i>turgidum</i> | <i>dicoccum</i> | - | +  |
| Tdom16             | CItr 14437 | 4X | <i>Triticum</i> | <i>turgidum</i> | <i>dicoccum</i> | - | -  |

|               |            |    |                 |                 |                 |   |   |
|---------------|------------|----|-----------------|-----------------|-----------------|---|---|
| Tdom17        | CItr 14454 | 4X | <i>Triticum</i> | <i>turgidum</i> | <i>dicoccum</i> | - | - |
| Tdom18        | CItr 14592 | 4X | <i>Triticum</i> | <i>turgidum</i> | <i>dicoccum</i> | - | - |
| Tdom19        | CItr 14621 | 4X | <i>Triticum</i> | <i>turgidum</i> | <i>dicoccum</i> | - | - |
| Tdom20        | CItr 14636 | 4X | <i>Triticum</i> | <i>turgidum</i> | <i>dicoccum</i> | - | - |
| Tdom21        | CItr 14637 | 4X | <i>Triticum</i> | <i>turgidum</i> | <i>dicoccum</i> | - | - |
| Tdom22        | CItr 14638 | 4X | <i>Triticum</i> | <i>turgidum</i> | <i>dicoccum</i> | - | - |
| Tdom23        | CItr 14639 | 4X | <i>Triticum</i> | <i>turgidum</i> | <i>dicoccum</i> | - | - |
| Tdom24        | CItr 14751 | 4X | <i>Triticum</i> | <i>turgidum</i> | <i>dicoccum</i> | - | - |
| Tdom25        | CItr 14752 | 4X | <i>Triticum</i> | <i>turgidum</i> | <i>dicoccum</i> | - | - |
| Tdom26        | CItr 14787 | 4X | <i>Triticum</i> | <i>turgidum</i> | <i>dicoccum</i> | - | - |
| Tdom27        | CItr 14822 | 4X | <i>Triticum</i> | <i>turgidum</i> | <i>dicoccum</i> | - | - |
| Tdom28        | CItr 14824 | 4X | <i>Triticum</i> | <i>turgidum</i> | <i>dicoccum</i> | - | - |
| Tdom29        | CItr 14834 | 4X | <i>Triticum</i> | <i>turgidum</i> | <i>dicoccum</i> | - | - |
| Tdom30        | CItr 14838 | 4X | <i>Triticum</i> | <i>turgidum</i> | <i>dicoccum</i> | - | - |
| Tdom31        | CItr 14866 | 4X | <i>Triticum</i> | <i>turgidum</i> | <i>dicoccum</i> | - | - |
| Tdom32        | CItr 14867 | 4X | <i>Triticum</i> | <i>turgidum</i> | <i>dicoccum</i> | - | - |
| Tdom33        | CItr 14868 | 4X | <i>Triticum</i> | <i>turgidum</i> | <i>dicoccum</i> | - | - |
| Tdom34        | CItr 14916 | 4X | <i>Triticum</i> | <i>turgidum</i> | <i>dicoccum</i> | - | - |
| Tdom35        | CItr 14917 | 4X | <i>Triticum</i> | <i>turgidum</i> | <i>dicoccum</i> | - | - |
| <b>Tdom36</b> | CItr 14919 | 4X | <i>Triticum</i> | <i>turgidum</i> | <i>dicoccum</i> | - | + |
| Tdom37        | CItr 14970 | 4X | <i>Triticum</i> | <i>turgidum</i> | <i>dicoccum</i> | - | - |
| Tdom38        | CItr 14971 | 4X | <i>Triticum</i> | <i>turgidum</i> | <i>dicoccum</i> | - | - |
| Tdom39        | CItr 14972 | 4X | <i>Triticum</i> | <i>turgidum</i> | <i>dicoccum</i> | - | - |
| Tdom40        | PI 2789    | 4X | <i>Triticum</i> | <i>turgidum</i> | <i>dicoccum</i> | - | - |
| Tdom41        | PI 41024   | 4X | <i>Triticum</i> | <i>turgidum</i> | <i>dicoccum</i> | - | + |
| Tdom42        | PI 41025   | 4X | <i>Triticum</i> | <i>turgidum</i> | <i>dicoccum</i> | - | + |
| Tdom43        | PI 56234   | 4X | <i>Triticum</i> | <i>turgidum</i> | <i>dicoccum</i> | - | + |
| Tdom44        | PI 57536   | 4X | <i>Triticum</i> | <i>turgidum</i> | <i>dicoccum</i> | - | - |
| Tdom45        | PI 58788   | 4X | <i>Triticum</i> | <i>turgidum</i> | <i>dicoccum</i> | - | - |
| Tdom46        | PI 58789   | 4X | <i>Triticum</i> | <i>turgidum</i> | <i>dicoccum</i> | - | - |
| Tdom47        | PI 60704   | 4X | <i>Triticum</i> | <i>turgidum</i> | <i>dicoccum</i> | - | - |
| Tdom48        | PI 60706   | 4X | <i>Triticum</i> | <i>turgidum</i> | <i>dicoccum</i> | - | - |
| Tdom49        | PI 73388   | 4X | <i>Triticum</i> | <i>turgidum</i> | <i>dicoccum</i> | - | - |
| Tdom50        | PI 74104   | 4X | <i>Triticum</i> | <i>turgidum</i> | <i>dicoccum</i> | - | - |

|               |          |    |                 |                 |                 |   |   |
|---------------|----------|----|-----------------|-----------------|-----------------|---|---|
| Tdom51        | PI 74106 | 4X | <i>Triticum</i> | <i>turgidum</i> | <i>dicoccum</i> | - | - |
| Tdom52        | PI 74108 | 4X | <i>Triticum</i> | <i>turgidum</i> | <i>dicoccum</i> | - | - |
| Tdom53        | PI 79899 | 4X | <i>Triticum</i> | <i>turgidum</i> | <i>dicoccum</i> | - | - |
| Tdom54        | PI 94613 | 4X | <i>Triticum</i> | <i>turgidum</i> | <i>dicoccum</i> | - | - |
| Tdom55        | PI 94614 | 4X | <i>Triticum</i> | <i>turgidum</i> | <i>dicoccum</i> | - | - |
| Tdom56        | PI 94615 | 4X | <i>Triticum</i> | <i>turgidum</i> | <i>dicoccum</i> | - | - |
| Tdom57        | PI 94616 | 4X | <i>Triticum</i> | <i>turgidum</i> | <i>dicoccum</i> | - | - |
| Tdom58        | PI 94617 | 4X | <i>Triticum</i> | <i>turgidum</i> | <i>dicoccum</i> | - | + |
| Tdom59        | PI 94618 | 4X | <i>Triticum</i> | <i>turgidum</i> | <i>dicoccum</i> | - | + |
| Tdom60        | PI 94620 | 4X | <i>Triticum</i> | <i>turgidum</i> | <i>dicoccum</i> | - | - |
| Tdom61        | PI 94621 | 4X | <i>Triticum</i> | <i>turgidum</i> | <i>dicoccum</i> | - | - |
| Tdom62        | PI 94623 | 4X | <i>Triticum</i> | <i>turgidum</i> | <i>dicoccum</i> | - | - |
| <b>Tdom63</b> | PI 94624 | 4X | <i>Triticum</i> | <i>turgidum</i> | <i>dicoccum</i> | + | + |
| Tdom64        | PI 94625 | 4X | <i>Triticum</i> | <i>turgidum</i> | <i>dicoccum</i> | - | + |
| Tdom65        | PI 94626 | 4X | <i>Triticum</i> | <i>turgidum</i> | <i>dicoccum</i> | - | - |
| Tdom66        | PI 94627 | 4X | <i>Triticum</i> | <i>turgidum</i> | <i>dicoccum</i> | - | - |
| Tdom67        | PI 94628 | 4X | <i>Triticum</i> | <i>turgidum</i> | <i>dicoccum</i> | - | + |
| Tdom68        | PI 94630 | 4X | <i>Triticum</i> | <i>turgidum</i> | <i>dicoccum</i> | - | - |
| Tdom69        | PI 94631 | 4X | <i>Triticum</i> | <i>turgidum</i> | <i>dicoccum</i> | - | - |
| Tdom70        | PI 94632 | 4X | <i>Triticum</i> | <i>turgidum</i> | <i>dicoccum</i> | - | - |
| Tdom71        | PI 94633 | 4X | <i>Triticum</i> | <i>turgidum</i> | <i>dicoccum</i> | - | - |
| Tdom72        | PI 94634 | 4X | <i>Triticum</i> | <i>turgidum</i> | <i>dicoccum</i> | - | - |
| Tdom73        | PI 94635 | 4X | <i>Triticum</i> | <i>turgidum</i> | <i>dicoccum</i> | - | - |
| Tdom74        | PI 94636 | 4X | <i>Triticum</i> | <i>turgidum</i> | <i>dicoccum</i> | - | + |
| Tdom75        | PI 94637 | 4X | <i>Triticum</i> | <i>turgidum</i> | <i>dicoccum</i> | - | + |
| Tdom76        | PI 94638 | 4X | <i>Triticum</i> | <i>turgidum</i> | <i>dicoccum</i> | - | - |
| Tdom77        | PI 94640 | 4X | <i>Triticum</i> | <i>turgidum</i> | <i>dicoccum</i> | - | - |
| Tdom78        | PI 94641 | 4X | <i>Triticum</i> | <i>turgidum</i> | <i>dicoccum</i> | - | - |
| Tdom79        | PI 94642 | 4X | <i>Triticum</i> | <i>turgidum</i> | <i>dicoccum</i> | - | + |
| Tdom80        | PI 94648 | 4X | <i>Triticum</i> | <i>turgidum</i> | <i>dicoccum</i> | - | - |
| Tdom81        | PI 94649 | 4X | <i>Triticum</i> | <i>turgidum</i> | <i>dicoccum</i> | - | + |
| Tdom82        | PI 94650 | 4X | <i>Triticum</i> | <i>turgidum</i> | <i>dicoccum</i> | - | - |
| Tdom83        | PI 94654 | 4X | <i>Triticum</i> | <i>turgidum</i> | <i>dicoccum</i> | - | + |
| Tdom84        | PI 94655 | 4X | <i>Triticum</i> | <i>turgidum</i> | <i>dicoccum</i> | - | + |

|         |           |    |                 |                 |                 |   |   |
|---------|-----------|----|-----------------|-----------------|-----------------|---|---|
| Tdom85  | PI 94656  | 4X | <i>Triticum</i> | <i>turgidum</i> | <i>dicoccum</i> | - | + |
| Tdom86  | PI 94657  | 4X | <i>Triticum</i> | <i>turgidum</i> | <i>dicoccum</i> | - | - |
| Tdom87  | PI 94659  | 4X | <i>Triticum</i> | <i>turgidum</i> | <i>dicoccum</i> | - | - |
| Tdom88  | PI 94660  | 4X | <i>Triticum</i> | <i>turgidum</i> | <i>dicoccum</i> | - | + |
| Tdom89  | PI 94661  | 4X | <i>Triticum</i> | <i>turgidum</i> | <i>dicoccum</i> | - | - |
| Tdom90  | PI 94662  | 4X | <i>Triticum</i> | <i>turgidum</i> | <i>dicoccum</i> | - | - |
| Tdom91  | PI 94663  | 4X | <i>Triticum</i> | <i>turgidum</i> | <i>dicoccum</i> | - | - |
| Tdom92  | PI 94664  | 4X | <i>Triticum</i> | <i>turgidum</i> | <i>dicoccum</i> | - | - |
| Tdom93  | PI 94665  | 4X | <i>Triticum</i> | <i>turgidum</i> | <i>dicoccum</i> | - | - |
| Tdom94  | PI 94666  | 4X | <i>Triticum</i> | <i>turgidum</i> | <i>dicoccum</i> | - | - |
| Tdom95  | PI 94667  | 4X | <i>Triticum</i> | <i>turgidum</i> | <i>dicoccum</i> | - | - |
| Tdom96  | PI 94668  | 4X | <i>Triticum</i> | <i>turgidum</i> | <i>dicoccum</i> | - | - |
| Tdom97  | PI 94669  | 4X | <i>Triticum</i> | <i>turgidum</i> | <i>dicoccum</i> | - | - |
| Tdom98  | PI 94670  | 4X | <i>Triticum</i> | <i>turgidum</i> | <i>dicoccum</i> | - | - |
| Tdom99  | PI 94671  | 4X | <i>Triticum</i> | <i>turgidum</i> | <i>dicoccum</i> | - | - |
| Tdom100 | PI 94673  | 4X | <i>Triticum</i> | <i>turgidum</i> | <i>dicoccum</i> | - | - |
| Tdom101 | PI 94674  | 4X | <i>Triticum</i> | <i>turgidum</i> | <i>dicoccum</i> | - | + |
| Tdom102 | PI 94675  | 4X | <i>Triticum</i> | <i>turgidum</i> | <i>dicoccum</i> | - | - |
| Tdom103 | PI 94676  | 4X | <i>Triticum</i> | <i>turgidum</i> | <i>dicoccum</i> | - | + |
| Tdom104 | PI 94677  | 4X | <i>Triticum</i> | <i>turgidum</i> | <i>dicoccum</i> | - | + |
| Tdom105 | PI 94678  | 4X | <i>Triticum</i> | <i>turgidum</i> | <i>dicoccum</i> | - | + |
| Tdom106 | PI 94679  | 4X | <i>Triticum</i> | <i>turgidum</i> | <i>dicoccum</i> | - | - |
| Tdom107 | PI 94680  | 4X | <i>Triticum</i> | <i>turgidum</i> | <i>dicoccum</i> | - | - |
| Tdom108 | PI 94681  | 4X | <i>Triticum</i> | <i>turgidum</i> | <i>dicoccum</i> | - | - |
| Tdom109 | PI 94682  | 4X | <i>Triticum</i> | <i>turgidum</i> | <i>dicoccum</i> | - | + |
| Tdom110 | PI 94683  | 4X | <i>Triticum</i> | <i>turgidum</i> | <i>dicoccum</i> | - | + |
| Tdom111 | PI 94738  | 4X | <i>Triticum</i> | <i>turgidum</i> | <i>dicoccum</i> | - | + |
| Tdom112 | PI 94747  | 4X | <i>Triticum</i> | <i>turgidum</i> | <i>dicoccum</i> | - | + |
| Tdom113 | PI 101971 | 4X | <i>Triticum</i> | <i>turgidum</i> | <i>dicoccum</i> | - | + |
| Tdom114 | PI 13961  | 4X | <i>Triticum</i> | <i>turgidum</i> | <i>dicoccum</i> | - | + |
| Tdom115 | PI 13963  | 4X | <i>Triticum</i> | <i>turgidum</i> | <i>dicoccum</i> | - | - |
| Tdom116 | PI 133134 | 4X | <i>Triticum</i> | <i>turgidum</i> | <i>dicoccum</i> | - | + |
| Tdom117 | PI 154582 | 4X | <i>Triticum</i> | <i>turgidum</i> | <i>dicoccum</i> | - | + |
| Tdom118 | PI 164578 | 4X | <i>Triticum</i> | <i>turgidum</i> | <i>dicoccum</i> | - | + |

|                |           |    |                 |                 |                 |   |   |
|----------------|-----------|----|-----------------|-----------------|-----------------|---|---|
| Tdom119        | PI 164582 | 4X | <i>Triticum</i> | <i>turgidum</i> | <i>dicoccum</i> | - | + |
| <b>Tdom120</b> | PI 168673 | 4X | <i>Triticum</i> | <i>turgidum</i> | <i>dicoccum</i> | - | + |
| Tdom121        | PI 168675 | 4X | <i>Triticum</i> | <i>turgidum</i> | <i>dicoccum</i> | - | + |
| Tdom122        | PI 168676 | 4X | <i>Triticum</i> | <i>turgidum</i> | <i>dicoccum</i> | - | - |
| Tdom123        | PI 168677 | 4X | <i>Triticum</i> | <i>turgidum</i> | <i>dicoccum</i> | - | - |
| Tdom124        | PI 168678 | 4X | <i>Triticum</i> | <i>turgidum</i> | <i>dicoccum</i> | - | - |
| Tdom125        | PI 168679 | 4X | <i>Triticum</i> | <i>turgidum</i> | <i>dicoccum</i> | - | - |
| Tdom126        | PI 190920 | 4X | <i>Triticum</i> | <i>turgidum</i> | <i>dicoccum</i> | - | + |
| Tdom127        | PI 190921 | 4X | <i>Triticum</i> | <i>turgidum</i> | <i>dicoccum</i> | - | + |
| Tdom128        | PI 190922 | 4X | <i>Triticum</i> | <i>turgidum</i> | <i>dicoccum</i> | - | + |
| Tdom129        | PI 190923 | 4X | <i>Triticum</i> | <i>turgidum</i> | <i>dicoccum</i> | - | - |
| Tdom130        | PI 190926 | 4X | <i>Triticum</i> | <i>turgidum</i> | <i>dicoccum</i> | - | + |
| Tdom131        | PI 191091 | 4X | <i>Triticum</i> | <i>turgidum</i> | <i>dicoccum</i> | - | + |
| Tdom132        | PI 191386 | 4X | <i>Triticum</i> | <i>turgidum</i> | <i>dicoccum</i> | - | - |
| Tdom133        | PI 191387 | 4X | <i>Triticum</i> | <i>turgidum</i> | <i>dicoccum</i> | - | - |
| Tdom134        | PI 191390 | 4X | <i>Triticum</i> | <i>turgidum</i> | <i>dicoccum</i> | - | + |
| <b>Tdom135</b> | PI 193641 | 4X | <i>Triticum</i> | <i>turgidum</i> | <i>dicoccum</i> | + | + |
| Tdom136        | PI 193642 | 4X | <i>Triticum</i> | <i>turgidum</i> | <i>dicoccum</i> | - | - |
| Tdom137        | PI 193643 | 4X | <i>Triticum</i> | <i>turgidum</i> | <i>dicoccum</i> | - | - |
| Tdom138        | PI 193644 | 4X | <i>Triticum</i> | <i>turgidum</i> | <i>dicoccum</i> | - | - |
| Tdom139        | PI 193873 | 4X | <i>Triticum</i> | <i>turgidum</i> | <i>dicoccum</i> | - | - |
| Tdom140        | PI 193877 | 4X | <i>Triticum</i> | <i>turgidum</i> | <i>dicoccum</i> | - | - |
| Tdom141        | PI 193878 | 4X | <i>Triticum</i> | <i>turgidum</i> | <i>dicoccum</i> | - | - |
| Tdom142        | PI 193879 | 4X | <i>Triticum</i> | <i>turgidum</i> | <i>dicoccum</i> | - | - |
| Tdom143        | PI 193880 | 4X | <i>Triticum</i> | <i>turgidum</i> | <i>dicoccum</i> | - | - |
| Tdom144        | PI 193882 | 4X | <i>Triticum</i> | <i>turgidum</i> | <i>dicoccum</i> | - | - |
| Tdom145        | PI 193883 | 4X | <i>Triticum</i> | <i>turgidum</i> | <i>dicoccum</i> | - | - |
| Tdom146        | PI 194041 | 4X | <i>Triticum</i> | <i>turgidum</i> | <i>dicoccum</i> | - | - |
| Tdom147        | PI 194042 | 4X | <i>Triticum</i> | <i>turgidum</i> | <i>dicoccum</i> | - | - |
| Tdom148        | PI 194375 | 4X | <i>Triticum</i> | <i>turgidum</i> | <i>dicoccum</i> | - | - |
| Tdom149        | PI 195721 | 4X | <i>Triticum</i> | <i>turgidum</i> | <i>dicoccum</i> | - | - |
| Tdom150        | PI 195722 | 4X | <i>Triticum</i> | <i>turgidum</i> | <i>dicoccum</i> | - | - |
| Tdom151        | PI 195723 | 4X | <i>Triticum</i> | <i>turgidum</i> | <i>dicoccum</i> | - | - |
| Tdom152        | PI 196099 | 4X | <i>Triticum</i> | <i>turgidum</i> | <i>dicoccum</i> | - | - |

|                |           |    |                 |                 |                    |   |    |
|----------------|-----------|----|-----------------|-----------------|--------------------|---|----|
| Tdom153        | PI 196100 | 4X | <i>Triticum</i> | <i>turgidum</i> | <i>dicoccum</i>    | - | -  |
| Tdom154        | PI 196101 | 4X | <i>Triticum</i> | <i>turgidum</i> | <i>dicoccum</i>    | - | -  |
| Tdom155        | PI 196904 | 4X | <i>Triticum</i> | <i>turgidum</i> | <i>dicoccum</i>    | - | -  |
| Tdom156        | PI 196905 | 4X | <i>Triticum</i> | <i>turgidum</i> | <i>dicoccum</i>    | - | -  |
| Tdom157        | PI 197259 | 4X | <i>Triticum</i> | <i>turgidum</i> | <i>dicoccum</i>    | - | -  |
| Tdom158        | PI 197260 | 4X | <i>Triticum</i> | <i>turgidum</i> | <i>dicoccum</i>    | - | -  |
| Tdom159        | PI 197481 | 4X | <i>Triticum</i> | <i>turgidum</i> | <i>dicoccum</i>    | - | -  |
| Tdom160        | PI 197482 | 4X | <i>Triticum</i> | <i>turgidum</i> | <i>dicoccum</i>    | - | -  |
| Tdom161        | PI 197483 | 4X | <i>Triticum</i> | <i>turgidum</i> | <i>dicoccum</i>    | - | -  |
| Tdom162        | PI 197484 | 4X | <i>Triticum</i> | <i>turgidum</i> | <i>dicoccum</i>    | - | -  |
| Tdom163        | PI 197485 | 4X | <i>Triticum</i> | <i>turgidum</i> | <i>dicoccum</i>    | - | -  |
| Tdom164        | PI 197486 | 4X | <i>Triticum</i> | <i>turgidum</i> | <i>dicoccum</i>    | - | -  |
| Tdom165        | PI 197487 | 4X | <i>Triticum</i> | <i>turgidum</i> | <i>dicoccum</i>    | - | -  |
| Tdom166        | PI 197488 | 4X | <i>Triticum</i> | <i>turgidum</i> | <i>dicoccum</i>    | - | -  |
| Tdom167        | PI 197489 | 4X | <i>Triticum</i> | <i>turgidum</i> | <i>dicoccum</i>    | - | -  |
| Tdom168        | PI 197490 | 4X | <i>Triticum</i> | <i>turgidum</i> | <i>dicoccum</i>    | - | -  |
| Tdom169        | PI 197491 | 4X | <i>Triticum</i> | <i>turgidum</i> | <i>dicoccum</i>    | - | -  |
| Tdom170        | PI 197492 | 4X | <i>Triticum</i> | <i>turgidum</i> | <i>dicoccum</i>    | - | -  |
| Tdom171        | PI 197493 | 4X | <i>Triticum</i> | <i>turgidum</i> | <i>dicoccum</i>    | - | -  |
| Tdom172        | PI 197494 | 4X | <i>Triticum</i> | <i>turgidum</i> | <i>dicoccum</i>    | - | -  |
| Tdom173        | PI 197495 | 4X | <i>Triticum</i> | <i>turgidum</i> | <i>dicoccum</i>    | - | -  |
| Tdom174        | PI 197496 | 4X | <i>Triticum</i> | <i>turgidum</i> | <i>dicoccum</i>    | - | -  |
| Tdom175        | PI 217637 | 4X | <i>Triticum</i> | <i>turgidum</i> | <i>dicoccum</i>    | - | +  |
| Tdom176        | PI 217639 | 4X | <i>Triticum</i> | <i>turgidum</i> | <i>dicoccum</i>    | - | +  |
| Tdom177        | PI 217640 | 4X | <i>Triticum</i> | <i>turgidum</i> | <i>dicoccum</i>    | - | +  |
| <b>Tdom178</b> | PI 221400 | 4X | <i>Triticum</i> | <i>turgidum</i> | <i>dicoccum</i>    | + | +  |
| 2470           | PI 190919 | 4X | <i>Triticum</i> | <i>turgidum</i> | <i>dicoccum</i>    | - | NA |
|                | PI 233288 | 4X | <i>Triticum</i> | <i>turgidum</i> | <i>dicoccoides</i> | - | NA |
| DS-9           | PI 256029 | 4X | <i>Triticum</i> | <i>turgidum</i> | <i>dicoccoides</i> | - | NA |
| T.d 84         | PI 266841 | 4X | <i>Triticum</i> | <i>turgidum</i> | <i>dicoccoides</i> | - | NA |
| I-1-2708       | PI 272582 | 4X | <i>Triticum</i> | <i>turgidum</i> | <i>dicoccoides</i> | - | NA |
| Arbel          | PI 300989 | 4X | <i>Triticum</i> | <i>turgidum</i> | <i>dicoccoides</i> | - | NA |
|                | PI 300990 | 4X | <i>Triticum</i> | <i>turgidum</i> | <i>dicoccum</i>    | - | NA |
| 17053 M65      | PI 316905 | 4X | <i>Triticum</i> | <i>turgidum</i> | <i>durum</i>       | - | NA |

|                    |           |    |                 |                 |                    |   |    |
|--------------------|-----------|----|-----------------|-----------------|--------------------|---|----|
| WIR 41965          | PI 343446 | 4X | <i>Triticum</i> | <i>turgidum</i> | <i>dicoccum</i>    | - | NA |
| Nakhichevan        | PI 346783 | 4X | <i>Triticum</i> | <i>turgidum</i> | <i>dicoccoides</i> | - | NA |
| Kotschyi           | PI 352323 | 4X | <i>Triticum</i> | <i>turgidum</i> | <i>dicoccoides</i> | - | NA |
| T-1503             | PI 352324 | 4X | <i>Triticum</i> | <i>turgidum</i> | <i>dicoccoides</i> | - | NA |
| Spontaneo villosum | PI 352326 | 4X | <i>Triticum</i> | <i>turgidum</i> | <i>dicoccoides</i> | - | NA |
| Namuricum          | PI 352327 | 4X | <i>Triticum</i> | <i>turgidum</i> | <i>dicoccoides</i> | - | NA |
| Schweinfurthii     | PI 352328 | 4X | <i>Triticum</i> | <i>turgidum</i> | <i>dicoccoides</i> | - | NA |
| 69Z99.2            | PI 355455 | 4X | <i>Triticum</i> | <i>turgidum</i> | <i>dicoccoides</i> | - | NA |
| 69Z99.3            | PI 355456 | 4X | <i>Triticum</i> | <i>turgidum</i> | <i>dicoccoides</i> | - | NA |
| 69Z99.4            | PI 355457 | 4X | <i>Triticum</i> | <i>turgidum</i> | <i>dicoccoides</i> | - | NA |
| 69Z99.6            | PI 355458 | 4X | <i>Triticum</i> | <i>turgidum</i> | <i>dicoccoides</i> | - | NA |
| 69Z99.7            | PI 355459 | 4X | <i>Triticum</i> | <i>turgidum</i> | <i>dicoccoides</i> | - | NA |
| G-100-1            | PI 414718 | 4X | <i>Triticum</i> | <i>turgidum</i> | <i>dicoccoides</i> | - | NA |
| G-214              | PI 414719 | 4X | <i>Triticum</i> | <i>turgidum</i> | <i>dicoccoides</i> | - | NA |
| G-236              | PI 414720 | 4X | <i>Triticum</i> | <i>turgidum</i> | <i>dicoccoides</i> | - | NA |
| G-267              | PI 414721 | 4X | <i>Triticum</i> | <i>turgidum</i> | <i>dicoccoides</i> | - | NA |
| G-290              | PI 414722 | 4X | <i>Triticum</i> | <i>turgidum</i> | <i>dicoccoides</i> | - | NA |
| G-233              | PI 415149 | 4X | <i>Triticum</i> | <i>turgidum</i> | <i>dicoccoides</i> | - | NA |
| G-278              | PI 415150 | 4X | <i>Triticum</i> | <i>turgidum</i> | <i>dicoccoides</i> | - | NA |
| G-288              | PI 415151 | 4X | <i>Triticum</i> | <i>turgidum</i> | <i>dicoccoides</i> | - | NA |
| G647               | PI 428013 | 4X | <i>Triticum</i> | <i>turgidum</i> | <i>dicoccoides</i> | - | NA |
| G1378              | PI 428015 | 4X | <i>Triticum</i> | <i>turgidum</i> | <i>dicoccoides</i> | - | NA |
| G2995              | PI 428094 | 4X | <i>Triticum</i> | <i>turgidum</i> | <i>dicoccoides</i> | - | NA |
| G3009              | PI 428096 | 4X | <i>Triticum</i> | <i>turgidum</i> | <i>dicoccoides</i> | - | NA |
| G3010              | PI 428097 | 4X | <i>Triticum</i> | <i>turgidum</i> | <i>dicoccoides</i> | - | NA |
| G3011              | PI 428098 | 4X | <i>Triticum</i> | <i>turgidum</i> | <i>dicoccoides</i> | - | NA |
| G3015              | PI 428099 | 4X | <i>Triticum</i> | <i>turgidum</i> | <i>dicoccoides</i> | - | NA |
| G3018              | PI 428100 | 4X | <i>Triticum</i> | <i>turgidum</i> | <i>dicoccoides</i> | - | NA |
| G3022              | PI 428104 | 4X | <i>Triticum</i> | <i>turgidum</i> | <i>dicoccoides</i> | - | NA |
| B+15               | PI 466949 | 4X | <i>Triticum</i> | <i>turgidum</i> | <i>dicoccoides</i> | - | NA |
| B+31               | PI 466950 | 4X | <i>Triticum</i> | <i>turgidum</i> | <i>dicoccoides</i> | - | NA |
| B+32               | PI 466951 | 4X | <i>Triticum</i> | <i>turgidum</i> | <i>dicoccoides</i> | - | NA |
| B+34               | PI 466952 | 4X | <i>Triticum</i> | <i>turgidum</i> | <i>dicoccoides</i> | - | NA |
| B+39               | PI 466953 | 4X | <i>Triticum</i> | <i>turgidum</i> | <i>dicoccoides</i> | - | NA |

|      |           |    |                 |                 |                    |   |    |
|------|-----------|----|-----------------|-----------------|--------------------|---|----|
| B+40 | PI 466954 | 4X | <i>Triticum</i> | <i>turgidum</i> | <i>dicoccoides</i> | - | NA |
| I+4  | PI 466955 | 4X | <i>Triticum</i> | <i>turgidum</i> | <i>dicoccoides</i> | - | NA |
| I+5  | PI 466956 | 4X | <i>Triticum</i> | <i>turgidum</i> | <i>dicoccoides</i> | - | NA |
| I-6  | PI 466957 | 4X | <i>Triticum</i> | <i>turgidum</i> | <i>dicoccoides</i> | - | NA |
| I-31 | PI 466968 | 4X | <i>Triticum</i> | <i>turgidum</i> | <i>dicoccoides</i> | - | NA |
| I+32 | PI 466969 | 4X | <i>Triticum</i> | <i>turgidum</i> | <i>dicoccoides</i> | - | NA |
| I-33 | PI 466970 | 4X | <i>Triticum</i> | <i>turgidum</i> | <i>dicoccoides</i> | - | NA |
| I+34 | PI 466971 | 4X | <i>Triticum</i> | <i>turgidum</i> | <i>dicoccoides</i> | - | NA |
| I-35 | PI 466972 | 4X | <i>Triticum</i> | <i>turgidum</i> | <i>dicoccoides</i> | - | NA |
| I-37 | PI 466974 | 4X | <i>Triticum</i> | <i>turgidum</i> | <i>dicoccoides</i> | - | NA |
| I+38 | PI 466975 | 4X | <i>Triticum</i> | <i>turgidum</i> | <i>dicoccoides</i> | - | NA |
| I+42 | PI 466977 | 4X | <i>Triticum</i> | <i>turgidum</i> | <i>dicoccoides</i> | - | NA |
| I-55 | PI 466980 | 4X | <i>Triticum</i> | <i>turgidum</i> | <i>dicoccoides</i> | - | NA |
| F-19 | PI 466981 | 4X | <i>Triticum</i> | <i>turgidum</i> | <i>dicoccoides</i> | - | NA |
| F-20 | PI 466982 | 4X | <i>Triticum</i> | <i>turgidum</i> | <i>dicoccoides</i> | - | NA |
| F-25 | PI 466983 | 4X | <i>Triticum</i> | <i>turgidum</i> | <i>dicoccoides</i> | - | NA |
| F+26 | PI 466984 | 4X | <i>Triticum</i> | <i>turgidum</i> | <i>dicoccoides</i> | - | NA |
| F+36 | PI 466985 | 4X | <i>Triticum</i> | <i>turgidum</i> | <i>dicoccoides</i> | - | NA |
| F+54 | PI 466986 | 4X | <i>Triticum</i> | <i>turgidum</i> | <i>dicoccoides</i> | - | NA |
| F-73 | PI 466988 | 4X | <i>Triticum</i> | <i>turgidum</i> | <i>dicoccoides</i> | - | NA |
| F-77 | PI 466989 | 4X | <i>Triticum</i> | <i>turgidum</i> | <i>dicoccoides</i> | - | NA |
| F-83 | PI 466990 | 4X | <i>Triticum</i> | <i>turgidum</i> | <i>dicoccoides</i> | - | NA |
| J-12 | PI 466996 | 4X | <i>Triticum</i> | <i>turgidum</i> | <i>dicoccoides</i> | - | NA |
| J-21 | PI 466997 | 4X | <i>Triticum</i> | <i>turgidum</i> | <i>dicoccoides</i> | - | NA |
| J+23 | PI 466998 | 4X | <i>Triticum</i> | <i>turgidum</i> | <i>dicoccoides</i> | - | NA |
| J-27 | PI 466999 | 4X | <i>Triticum</i> | <i>turgidum</i> | <i>dicoccoides</i> | - | NA |
| J-38 | PI 467000 | 4X | <i>Triticum</i> | <i>turgidum</i> | <i>dicoccoides</i> | - | NA |
| J+39 | PI 467001 | 4X | <i>Triticum</i> | <i>turgidum</i> | <i>dicoccoides</i> | - | NA |
| J+44 | PI 467002 | 4X | <i>Triticum</i> | <i>turgidum</i> | <i>dicoccoides</i> | - | NA |
| J-47 | PI 467003 | 4X | <i>Triticum</i> | <i>turgidum</i> | <i>dicoccoides</i> | - | NA |
| H+1  | PI 467004 | 4X | <i>Triticum</i> | <i>turgidum</i> | <i>dicoccoides</i> | - | NA |
| H+2  | PI 467005 | 4X | <i>Triticum</i> | <i>turgidum</i> | <i>dicoccoides</i> | - | NA |
| H+6  | PI 467006 | 4X | <i>Triticum</i> | <i>turgidum</i> | <i>dicoccoides</i> | - | NA |
| H+7  | PI 467007 | 4X | <i>Triticum</i> | <i>turgidum</i> | <i>dicoccoides</i> | - | NA |

|           |           |    |                 |                 |                    |   |    |
|-----------|-----------|----|-----------------|-----------------|--------------------|---|----|
| H-10      | PI 467008 | 4X | <i>Triticum</i> | <i>turgidum</i> | <i>dicoccoides</i> | - | NA |
| H+11      | PI 467009 | 4X | <i>Triticum</i> | <i>turgidum</i> | <i>dicoccoides</i> | - | NA |
| H+15      | PI 467012 | 4X | <i>Triticum</i> | <i>turgidum</i> | <i>dicoccoides</i> | - | NA |
| H-16      | PI 467013 | 4X | <i>Triticum</i> | <i>turgidum</i> | <i>dicoccoides</i> | - | NA |
| H+22      | PI 467014 | 4X | <i>Triticum</i> | <i>turgidum</i> | <i>dicoccoides</i> | - | NA |
| H+23      | PI 467015 | 4X | <i>Triticum</i> | <i>turgidum</i> | <i>dicoccoides</i> | - | NA |
| H+24      | PI 467016 | 4X | <i>Triticum</i> | <i>turgidum</i> | <i>dicoccoides</i> | - | NA |
| H+25      | PI 467017 | 4X | <i>Triticum</i> | <i>turgidum</i> | <i>dicoccoides</i> | - | NA |
| H+27      | PI 467018 | 4X | <i>Triticum</i> | <i>turgidum</i> | <i>dicoccoides</i> | - | NA |
| H+34      | PI 467022 | 4X | <i>Triticum</i> | <i>turgidum</i> | <i>dicoccoides</i> | - | NA |
| H+40      | PI 467023 | 4X | <i>Triticum</i> | <i>turgidum</i> | <i>dicoccoides</i> | - | NA |
| H+45      | PI 467024 | 4X | <i>Triticum</i> | <i>turgidum</i> | <i>dicoccoides</i> | - | NA |
| H+48      | PI 467025 | 4X | <i>Triticum</i> | <i>turgidum</i> | <i>dicoccoides</i> | - | NA |
| H+51      | PI 467026 | 4X | <i>Triticum</i> | <i>turgidum</i> | <i>dicoccoides</i> | - | NA |
| H-53      | PI 467027 | 4X | <i>Triticum</i> | <i>turgidum</i> | <i>dicoccoides</i> | - | NA |
| G 15-1M   | PI 467029 | 4X | <i>Triticum</i> | <i>turgidum</i> | <i>dicoccoides</i> | - | NA |
| G 32-1M2  | PI 467031 | 4X | <i>Triticum</i> | <i>turgidum</i> | <i>dicoccoides</i> | - | NA |
| G 79-1    | PI 467033 | 4X | <i>Triticum</i> | <i>turgidum</i> | <i>dicoccoides</i> | - | NA |
| G 88-1M-5 | PI 467034 | 4X | <i>Triticum</i> | <i>turgidum</i> | <i>dicoccoides</i> | - | NA |
| G 219     | PI 467036 | 4X | <i>Triticum</i> | <i>turgidum</i> | <i>dicoccoides</i> | - | NA |
| G 228-M   | PI 467037 | 4X | <i>Triticum</i> | <i>turgidum</i> | <i>dicoccoides</i> | - | NA |
| G 320-M   | PI 467041 | 4X | <i>Triticum</i> | <i>turgidum</i> | <i>dicoccoides</i> | - | NA |
| G 353     | PI 467043 | 4X | <i>Triticum</i> | <i>turgidum</i> | <i>dicoccoides</i> | - | NA |
| G 412-M   | PI 467049 | 4X | <i>Triticum</i> | <i>turgidum</i> | <i>dicoccoides</i> | - | NA |
| G 451-1   | PI 467051 | 4X | <i>Triticum</i> | <i>turgidum</i> | <i>dicoccoides</i> | - | NA |
| 52        | PI 470951 | 4X | <i>Triticum</i> | <i>turgidum</i> | <i>dicoccoides</i> | - | NA |
| 61        | PI 470952 | 4X | <i>Triticum</i> | <i>turgidum</i> | <i>dicoccoides</i> | - | NA |
| 8         | PI 470957 | 4X | <i>Triticum</i> | <i>turgidum</i> | <i>dicoccoides</i> | - | NA |
| 13        | PI 470958 | 4X | <i>Triticum</i> | <i>turgidum</i> | <i>dicoccoides</i> | - | NA |
| 19        | PI 470959 | 4X | <i>Triticum</i> | <i>turgidum</i> | <i>dicoccoides</i> | - | NA |
| 22        | PI 470960 | 4X | <i>Triticum</i> | <i>turgidum</i> | <i>dicoccoides</i> | - | NA |
| 26        | PI 470961 | 4X | <i>Triticum</i> | <i>turgidum</i> | <i>dicoccoides</i> | - | NA |
| 35        | PI 470962 | 4X | <i>Triticum</i> | <i>turgidum</i> | <i>dicoccoides</i> | - | NA |
| 37        | PI 470963 | 4X | <i>Triticum</i> | <i>turgidum</i> | <i>dicoccoides</i> | - | NA |

|       |           |    |                 |                 |                    |   |    |
|-------|-----------|----|-----------------|-----------------|--------------------|---|----|
| 19    | PI 470966 | 4X | <i>Triticum</i> | <i>turgidum</i> | <i>dicoccoides</i> | - | NA |
| 37    | PI 470972 | 4X | <i>Triticum</i> | <i>turgidum</i> | <i>dicoccoides</i> | - | NA |
| 48    | PI 470974 | 4X | <i>Triticum</i> | <i>turgidum</i> | <i>dicoccoides</i> | - | NA |
| 69    | PI 470976 | 4X | <i>Triticum</i> | <i>turgidum</i> | <i>dicoccoides</i> | - | NA |
| 7     | PI 470990 | 4X | <i>Triticum</i> | <i>turgidum</i> | <i>dicoccoides</i> | - | NA |
| 62    | PI 471013 | 4X | <i>Triticum</i> | <i>turgidum</i> | <i>dicoccoides</i> | - | NA |
| 6     | PI 471017 | 4X | <i>Triticum</i> | <i>turgidum</i> | <i>dicoccoides</i> | - | NA |
| 1     | PI 471035 | 4X | <i>Triticum</i> | <i>turgidum</i> | <i>dicoccoides</i> | - | NA |
| 2     | PI 471036 | 4X | <i>Triticum</i> | <i>turgidum</i> | <i>dicoccoides</i> | - | NA |
| 4     | PI 471037 | 4X | <i>Triticum</i> | <i>turgidum</i> | <i>dicoccoides</i> | - | NA |
| 6     | PI 471038 | 4X | <i>Triticum</i> | <i>turgidum</i> | <i>dicoccoides</i> | - | NA |
| 7     | PI 471039 | 4X | <i>Triticum</i> | <i>turgidum</i> | <i>dicoccoides</i> | - | NA |
| 9     | PI 471040 | 4X | <i>Triticum</i> | <i>turgidum</i> | <i>dicoccoides</i> | - | NA |
| 10    | PI 471041 | 4X | <i>Triticum</i> | <i>turgidum</i> | <i>dicoccoides</i> | - | NA |
| 12    | PI 471042 | 4X | <i>Triticum</i> | <i>turgidum</i> | <i>dicoccoides</i> | - | NA |
| 13    | PI 471043 | 4X | <i>Triticum</i> | <i>turgidum</i> | <i>dicoccoides</i> | - | NA |
| 14    | PI 471044 | 4X | <i>Triticum</i> | <i>turgidum</i> | <i>dicoccoides</i> | - | NA |
| 19    | PI 471048 | 4X | <i>Triticum</i> | <i>turgidum</i> | <i>dicoccoides</i> | - | NA |
| 31    | PI 471056 | 4X | <i>Triticum</i> | <i>turgidum</i> | <i>dicoccoides</i> | - | NA |
| 33    | PI 471058 | 4X | <i>Triticum</i> | <i>turgidum</i> | <i>dicoccoides</i> | - | NA |
| 35    | PI 471059 | 4X | <i>Triticum</i> | <i>turgidum</i> | <i>dicoccoides</i> | - | NA |
| 36    | PI 471060 | 4X | <i>Triticum</i> | <i>turgidum</i> | <i>dicoccoides</i> | - | NA |
| 37    | PI 471061 | 4X | <i>Triticum</i> | <i>turgidum</i> | <i>dicoccoides</i> | - | NA |
| 44    | PI 471065 | 4X | <i>Triticum</i> | <i>turgidum</i> | <i>dicoccoides</i> | - | NA |
| 46    | PI 471067 | 4X | <i>Triticum</i> | <i>turgidum</i> | <i>dicoccoides</i> | - | NA |
| 48    | PI 471068 | 4X | <i>Triticum</i> | <i>turgidum</i> | <i>dicoccoides</i> | - | NA |
| 3     | PI 471070 | 4X | <i>Triticum</i> | <i>turgidum</i> | <i>dicoccoides</i> | - | NA |
| 4     | PI 471071 | 4X | <i>Triticum</i> | <i>turgidum</i> | <i>dicoccoides</i> | - | NA |
| 8     | PI 471072 | 4X | <i>Triticum</i> | <i>turgidum</i> | <i>dicoccoides</i> | - | NA |
| 17    | PI 471073 | 4X | <i>Triticum</i> | <i>turgidum</i> | <i>dicoccoides</i> | - | NA |
| 18    | PI 471074 | 4X | <i>Triticum</i> | <i>turgidum</i> | <i>dicoccoides</i> | - | NA |
| 37    | PI 471075 | 4X | <i>Triticum</i> | <i>turgidum</i> | <i>dicoccoides</i> | - | NA |
| 52    | PI 471076 | 4X | <i>Triticum</i> | <i>turgidum</i> | <i>dicoccoides</i> | - | NA |
| G-522 | PI 471602 | 4X | <i>Triticum</i> | <i>turgidum</i> | <i>dicoccoides</i> | - | NA |

---

|       |           |    |                 |                 |                    |   |    |
|-------|-----------|----|-----------------|-----------------|--------------------|---|----|
| G-523 | PI 471603 | 4X | <i>Triticum</i> | <i>turgidum</i> | <i>dicoccoides</i> | - | NA |
| G-524 | PI 471604 | 4X | <i>Triticum</i> | <i>turgidum</i> | <i>dicoccoides</i> | - | NA |
| G-525 | PI 471605 | 4X | <i>Triticum</i> | <i>turgidum</i> | <i>dicoccoides</i> | - | NA |
| G-526 | PI 471606 | 4X | <i>Triticum</i> | <i>turgidum</i> | <i>dicoccoides</i> | - | NA |
| G-537 | PI 471611 | 4X | <i>Triticum</i> | <i>turgidum</i> | <i>dicoccoides</i> | - | NA |
| G-543 | PI 471616 | 4X | <i>Triticum</i> | <i>turgidum</i> | <i>dicoccoides</i> | - | NA |
| G-545 | PI 471618 | 4X | <i>Triticum</i> | <i>turgidum</i> | <i>dicoccoides</i> | - | NA |
| G-552 | PI 471624 | 4X | <i>Triticum</i> | <i>turgidum</i> | <i>dicoccoides</i> | - | NA |
| G-562 | PI 471633 | 4X | <i>Triticum</i> | <i>turgidum</i> | <i>dicoccoides</i> | - | NA |
| G-564 | PI 471635 | 4X | <i>Triticum</i> | <i>turgidum</i> | <i>dicoccoides</i> | - | NA |
| G-565 | PI 471636 | 4X | <i>Triticum</i> | <i>turgidum</i> | <i>dicoccoides</i> | - | NA |
| G-566 | PI 471637 | 4X | <i>Triticum</i> | <i>turgidum</i> | <i>dicoccoides</i> | - | NA |
| G-568 | PI 471638 | 4X | <i>Triticum</i> | <i>turgidum</i> | <i>dicoccoides</i> | - | NA |
| G-569 | PI 471639 | 4X | <i>Triticum</i> | <i>turgidum</i> | <i>dicoccoides</i> | - | NA |
| G-570 | PI 471640 | 4X | <i>Triticum</i> | <i>turgidum</i> | <i>dicoccoides</i> | - | NA |
| G-571 | PI 471641 | 4X | <i>Triticum</i> | <i>turgidum</i> | <i>dicoccoides</i> | - | NA |
| G-572 | PI 471642 | 4X | <i>Triticum</i> | <i>turgidum</i> | <i>dicoccoides</i> | - | NA |
| G-573 | PI 471643 | 4X | <i>Triticum</i> | <i>turgidum</i> | <i>dicoccoides</i> | - | NA |
| G-574 | PI 471644 | 4X | <i>Triticum</i> | <i>turgidum</i> | <i>dicoccoides</i> | - | NA |
| G-575 | PI 471645 | 4X | <i>Triticum</i> | <i>turgidum</i> | <i>dicoccoides</i> | - | NA |
| G-576 | PI 471646 | 4X | <i>Triticum</i> | <i>turgidum</i> | <i>dicoccoides</i> | - | NA |
| G-579 | PI 471649 | 4X | <i>Triticum</i> | <i>turgidum</i> | <i>dicoccoides</i> | - | NA |
| G-581 | PI 471651 | 4X | <i>Triticum</i> | <i>turgidum</i> | <i>dicoccoides</i> | - | NA |
| G-584 | PI 471653 | 4X | <i>Triticum</i> | <i>turgidum</i> | <i>dicoccoides</i> | - | NA |
| G-585 | PI 471654 | 4X | <i>Triticum</i> | <i>turgidum</i> | <i>dicoccoides</i> | - | NA |
| G-588 | PI 471657 | 4X | <i>Triticum</i> | <i>turgidum</i> | <i>dicoccoides</i> | - | NA |
| G-589 | PI 471658 | 4X | <i>Triticum</i> | <i>turgidum</i> | <i>dicoccoides</i> | - | NA |
| G-590 | PI 471659 | 4X | <i>Triticum</i> | <i>turgidum</i> | <i>dicoccoides</i> | - | NA |
| G-591 | PI 471660 | 4X | <i>Triticum</i> | <i>turgidum</i> | <i>dicoccoides</i> | - | NA |
| G-592 | PI 471661 | 4X | <i>Triticum</i> | <i>turgidum</i> | <i>dicoccoides</i> | - | NA |
| G-593 | PI 471662 | 4X | <i>Triticum</i> | <i>turgidum</i> | <i>dicoccoides</i> | - | NA |
| G-594 | PI 471663 | 4X | <i>Triticum</i> | <i>turgidum</i> | <i>dicoccoides</i> | - | NA |
| G-595 | PI 471664 | 4X | <i>Triticum</i> | <i>turgidum</i> | <i>dicoccoides</i> | - | NA |
| G-596 | PI 471665 | 4X | <i>Triticum</i> | <i>turgidum</i> | <i>dicoccoides</i> | - | NA |

---

---

|       |           |    |                 |                 |                    |   |    |
|-------|-----------|----|-----------------|-----------------|--------------------|---|----|
| G-597 | PI 471666 | 4X | <i>Triticum</i> | <i>turgidum</i> | <i>dicoccoides</i> | - | NA |
| G-598 | PI 471667 | 4X | <i>Triticum</i> | <i>turgidum</i> | <i>dicoccoides</i> | - | NA |
| G-600 | PI 471669 | 4X | <i>Triticum</i> | <i>turgidum</i> | <i>dicoccoides</i> | - | NA |
| G-601 | PI 471670 | 4X | <i>Triticum</i> | <i>turgidum</i> | <i>dicoccoides</i> | - | NA |
| G-602 | PI 471671 | 4X | <i>Triticum</i> | <i>turgidum</i> | <i>dicoccoides</i> | - | NA |
| G-603 | PI 471672 | 4X | <i>Triticum</i> | <i>turgidum</i> | <i>dicoccoides</i> | - | NA |
| G-604 | PI 471673 | 4X | <i>Triticum</i> | <i>turgidum</i> | <i>dicoccoides</i> | - | NA |
| G-605 | PI 471674 | 4X | <i>Triticum</i> | <i>turgidum</i> | <i>dicoccoides</i> | - | NA |
| G-606 | PI 471675 | 4X | <i>Triticum</i> | <i>turgidum</i> | <i>dicoccoides</i> | - | NA |
| G-611 | PI 471677 | 4X | <i>Triticum</i> | <i>turgidum</i> | <i>dicoccoides</i> | - | NA |
| G-613 | PI 471678 | 4X | <i>Triticum</i> | <i>turgidum</i> | <i>dicoccoides</i> | - | NA |
| G-614 | PI 471679 | 4X | <i>Triticum</i> | <i>turgidum</i> | <i>dicoccoides</i> | - | NA |
| G-617 | PI 471681 | 4X | <i>Triticum</i> | <i>turgidum</i> | <i>dicoccoides</i> | - | NA |
| G-619 | PI 471683 | 4X | <i>Triticum</i> | <i>turgidum</i> | <i>dicoccoides</i> | - | NA |
| G-621 | PI 471684 | 4X | <i>Triticum</i> | <i>turgidum</i> | <i>dicoccoides</i> | - | NA |
| G-623 | PI 471685 | 4X | <i>Triticum</i> | <i>turgidum</i> | <i>dicoccoides</i> | - | NA |
| G-624 | PI 471686 | 4X | <i>Triticum</i> | <i>turgidum</i> | <i>dicoccoides</i> | - | NA |
| G-632 | PI 471690 | 4X | <i>Triticum</i> | <i>turgidum</i> | <i>dicoccoides</i> | - | NA |
| G-637 | PI 471695 | 4X | <i>Triticum</i> | <i>turgidum</i> | <i>dicoccoides</i> | - | NA |
| G-638 | PI 471696 | 4X | <i>Triticum</i> | <i>turgidum</i> | <i>dicoccoides</i> | - | NA |
| G-652 | PI 471705 | 4X | <i>Triticum</i> | <i>turgidum</i> | <i>dicoccoides</i> | - | NA |
| G-654 | PI 471707 | 4X | <i>Triticum</i> | <i>turgidum</i> | <i>dicoccoides</i> | - | NA |
| G-657 | PI 471708 | 4X | <i>Triticum</i> | <i>turgidum</i> | <i>dicoccoides</i> | - | NA |
| G-659 | PI 471709 | 4X | <i>Triticum</i> | <i>turgidum</i> | <i>dicoccoides</i> | - | NA |
| G-660 | PI 471710 | 4X | <i>Triticum</i> | <i>turgidum</i> | <i>dicoccoides</i> | - | NA |
| G-668 | PI 471716 | 4X | <i>Triticum</i> | <i>turgidum</i> | <i>dicoccoides</i> | - | NA |
| G-682 | PI 471727 | 4X | <i>Triticum</i> | <i>turgidum</i> | <i>dicoccoides</i> | - | NA |
| G-684 | PI 471729 | 4X | <i>Triticum</i> | <i>turgidum</i> | <i>dicoccoides</i> | - | NA |
| G-685 | PI 471730 | 4X | <i>Triticum</i> | <i>turgidum</i> | <i>dicoccoides</i> | - | NA |
| G-686 | PI 471731 | 4X | <i>Triticum</i> | <i>turgidum</i> | <i>dicoccoides</i> | - | NA |
| G-687 | PI 471732 | 4X | <i>Triticum</i> | <i>turgidum</i> | <i>dicoccoides</i> | - | NA |
| G-688 | PI 471733 | 4X | <i>Triticum</i> | <i>turgidum</i> | <i>dicoccoides</i> | - | NA |
| G-689 | PI 471734 | 4X | <i>Triticum</i> | <i>turgidum</i> | <i>dicoccoides</i> | - | NA |
| G-691 | PI 471735 | 4X | <i>Triticum</i> | <i>turgidum</i> | <i>dicoccoides</i> | - | NA |

---

|                |           |    |                 |                 |                    |   |    |
|----------------|-----------|----|-----------------|-----------------|--------------------|---|----|
| G-692          | PI 471736 | 4X | <i>Triticum</i> | <i>turgidum</i> | <i>dicoccoides</i> | - | NA |
| G-719          | PI 471761 | 4X | <i>Triticum</i> | <i>turgidum</i> | <i>dicoccoides</i> | - | NA |
| G-720          | PI 471762 | 4X | <i>Triticum</i> | <i>turgidum</i> | <i>dicoccoides</i> | - | NA |
| G-280-1BM      | PI 471768 | 4X | <i>Triticum</i> | <i>turgidum</i> | <i>dicoccoides</i> | - | NA |
| G-28-2BM       | PI 471776 | 4X | <i>Triticum</i> | <i>turgidum</i> | <i>dicoccoides</i> | - | NA |
| G-29-1M-8      | PI 471777 | 4X | <i>Triticum</i> | <i>turgidum</i> | <i>dicoccoides</i> | - | NA |
| G-90-1-1BM     | PI 471779 | 4X | <i>Triticum</i> | <i>turgidum</i> | <i>dicoccoides</i> | - | NA |
| G-117-1-1-1-2M | PI 471780 | 4X | <i>Triticum</i> | <i>turgidum</i> | <i>dicoccoides</i> | - | NA |
| G-288-3-5M     | PI 471788 | 4X | <i>Triticum</i> | <i>turgidum</i> | <i>dicoccoides</i> | - | NA |
| G-303-1M       | PI 471789 | 4X | <i>Triticum</i> | <i>turgidum</i> | <i>dicoccoides</i> | - | NA |
| G-316-2-5M     | PI 471795 | 4X | <i>Triticum</i> | <i>turgidum</i> | <i>dicoccoides</i> | - | NA |
| G-332-1-3-5M   | PI 471798 | 4X | <i>Triticum</i> | <i>turgidum</i> | <i>dicoccoides</i> | - | NA |
| G-342-2-2M     | PI 471799 | 4X | <i>Triticum</i> | <i>turgidum</i> | <i>dicoccoides</i> | - | NA |
| G-348-4M       | PI 471801 | 4X | <i>Triticum</i> | <i>turgidum</i> | <i>dicoccoides</i> | - | NA |
| G-395-7M       | PI 471803 | 4X | <i>Triticum</i> | <i>turgidum</i> | <i>dicoccoides</i> | - | NA |
| G-416-4M       | PI 471804 | 4X | <i>Triticum</i> | <i>turgidum</i> | <i>dicoccoides</i> | - | NA |
| G-457-1        | PI 471805 | 4X | <i>Triticum</i> | <i>turgidum</i> | <i>dicoccoides</i> | - | NA |
| G-503M         | PI 471813 | 4X | <i>Triticum</i> | <i>turgidum</i> | <i>dicoccoides</i> | - | NA |
| G-275-1M       | PI 471817 | 4X | <i>Triticum</i> | <i>turgidum</i> | <i>dicoccoides</i> | - | NA |
| G-765          | PI 478686 | 4X | <i>Triticum</i> | <i>turgidum</i> | <i>dicoccoides</i> | - | NA |
| G-759M         | PI 478716 | 4X | <i>Triticum</i> | <i>turgidum</i> | <i>dicoccoides</i> | - | NA |
| G-529M         | PI 478730 | 4X | <i>Triticum</i> | <i>turgidum</i> | <i>dicoccoides</i> | - | NA |
| G-620          | PI 478735 | 4X | <i>Triticum</i> | <i>turgidum</i> | <i>dicoccoides</i> | - | NA |
| G-672          | PI 478741 | 4X | <i>Triticum</i> | <i>turgidum</i> | <i>dicoccoides</i> | - | NA |
| G-TD28         | PI 478742 | 4X | <i>Triticum</i> | <i>turgidum</i> | <i>dicoccoides</i> | - | -  |
| G-23-1M        | PI 478744 | 4X | <i>Triticum</i> | <i>turgidum</i> | <i>dicoccoides</i> | - | NA |
| G-510M         | PI 478748 | 4X | <i>Triticum</i> | <i>turgidum</i> | <i>dicoccoides</i> | - | NA |
| B-7            | PI 479777 | 4X | <i>Triticum</i> | <i>turgidum</i> | <i>dicoccoides</i> | - | NA |
| H-5            | PI 479778 | 4X | <i>Triticum</i> | <i>turgidum</i> | <i>dicoccoides</i> | - | NA |
| I-2            | PI 479779 | 4X | <i>Triticum</i> | <i>turgidum</i> | <i>dicoccoides</i> | - | NA |
| G-583-1B       | PI 481478 | 4X | <i>Triticum</i> | <i>turgidum</i> | <i>dicoccoides</i> | - | NA |
| G-632-M        | PI 481479 | 4X | <i>Triticum</i> | <i>turgidum</i> | <i>dicoccoides</i> | - | NA |
| G-729          | PI 481489 | 4X | <i>Triticum</i> | <i>turgidum</i> | <i>dicoccoides</i> | - | NA |
| G-731          | PI 481491 | 4X | <i>Triticum</i> | <i>turgidum</i> | <i>dicoccoides</i> | - | NA |

|        |           |    |                 |                 |                    |   |    |
|--------|-----------|----|-----------------|-----------------|--------------------|---|----|
| G-732  | PI 481492 | 4X | <i>Triticum</i> | <i>turgidum</i> | <i>dicoccoides</i> | - | NA |
| G-733  | PI 481493 | 4X | <i>Triticum</i> | <i>turgidum</i> | <i>dicoccoides</i> | - | NA |
| G-734  | PI 481494 | 4X | <i>Triticum</i> | <i>turgidum</i> | <i>dicoccoides</i> | - | NA |
| G-735  | PI 481495 | 4X | <i>Triticum</i> | <i>turgidum</i> | <i>dicoccoides</i> | - | NA |
| G-736  | PI 481496 | 4X | <i>Triticum</i> | <i>turgidum</i> | <i>dicoccoides</i> | - | NA |
| G-737  | PI 481497 | 4X | <i>Triticum</i> | <i>turgidum</i> | <i>dicoccoides</i> | - | NA |
| G-738  | PI 481498 | 4X | <i>Triticum</i> | <i>turgidum</i> | <i>dicoccoides</i> | - | NA |
| G-739  | PI 481499 | 4X | <i>Triticum</i> | <i>turgidum</i> | <i>dicoccoides</i> | - | NA |
| G-740  | PI 481500 | 4X | <i>Triticum</i> | <i>turgidum</i> | <i>dicoccoides</i> | - | NA |
| G-741  | PI 481501 | 4X | <i>Triticum</i> | <i>turgidum</i> | <i>dicoccoides</i> | - | NA |
| G-742  | PI 481502 | 4X | <i>Triticum</i> | <i>turgidum</i> | <i>dicoccoides</i> | - | NA |
| G-743  | PI 481503 | 4X | <i>Triticum</i> | <i>turgidum</i> | <i>dicoccoides</i> | - | NA |
| G-745  | PI 481504 | 4X | <i>Triticum</i> | <i>turgidum</i> | <i>dicoccoides</i> | - | NA |
| G-746  | PI 481505 | 4X | <i>Triticum</i> | <i>turgidum</i> | <i>dicoccoides</i> | - | NA |
| G-748  | PI 481507 | 4X | <i>Triticum</i> | <i>turgidum</i> | <i>dicoccoides</i> | - | NA |
| G-750  | PI 481508 | 4X | <i>Triticum</i> | <i>turgidum</i> | <i>dicoccoides</i> | - | NA |
| G-751  | PI 481509 | 4X | <i>Triticum</i> | <i>turgidum</i> | <i>dicoccoides</i> | - | NA |
| G-752  | PI 481510 | 4X | <i>Triticum</i> | <i>turgidum</i> | <i>dicoccoides</i> | - | NA |
| G-753  | PI 481511 | 4X | <i>Triticum</i> | <i>turgidum</i> | <i>dicoccoides</i> | - | NA |
| G-755  | PI 481513 | 4X | <i>Triticum</i> | <i>turgidum</i> | <i>dicoccoides</i> | - | NA |
| G-757  | PI 481515 | 4X | <i>Triticum</i> | <i>turgidum</i> | <i>dicoccoides</i> | - | NA |
| G-758  | PI 481516 | 4X | <i>Triticum</i> | <i>turgidum</i> | <i>dicoccoides</i> | - | NA |
| G-760  | PI 481517 | 4X | <i>Triticum</i> | <i>turgidum</i> | <i>dicoccoides</i> | - | NA |
| G-761  | PI 481518 | 4X | <i>Triticum</i> | <i>turgidum</i> | <i>dicoccoides</i> | - | NA |
| G-762  | PI 481519 | 4X | <i>Triticum</i> | <i>turgidum</i> | <i>dicoccoides</i> | - | NA |
| G-764  | PI 481520 | 4X | <i>Triticum</i> | <i>turgidum</i> | <i>dicoccoides</i> | - | NA |
| G-TD29 | PI 481521 | 4X | <i>Triticum</i> | <i>turgidum</i> | <i>dicoccoides</i> | - | +  |
| G-769  | PI 481522 | 4X | <i>Triticum</i> | <i>turgidum</i> | <i>dicoccoides</i> | - | NA |
| G-771  | PI 481523 | 4X | <i>Triticum</i> | <i>turgidum</i> | <i>dicoccoides</i> | - | NA |
| G2996  | PI 538669 | 4X | <i>Triticum</i> | <i>turgidum</i> | <i>dicoccoides</i> | - | NA |
| G2997  | PI 538670 | 4X | <i>Triticum</i> | <i>turgidum</i> | <i>dicoccoides</i> | - | NA |
| G2998  | PI 538671 | 4X | <i>Triticum</i> | <i>turgidum</i> | <i>dicoccoides</i> | - | NA |
| G2999  | PI 538672 | 4X | <i>Triticum</i> | <i>turgidum</i> | <i>dicoccoides</i> | - | NA |
| G3000  | PI 538673 | 4X | <i>Triticum</i> | <i>turgidum</i> | <i>dicoccoides</i> | - | NA |

|          |           |    |                 |                 |                    |   |    |
|----------|-----------|----|-----------------|-----------------|--------------------|---|----|
| G3001    | PI 538674 | 4X | <i>Triticum</i> | <i>turgidum</i> | <i>dicoccoides</i> | - | NA |
| G3003    | PI 538676 | 4X | <i>Triticum</i> | <i>turgidum</i> | <i>dicoccoides</i> | - | NA |
| G3004    | PI 538677 | 4X | <i>Triticum</i> | <i>turgidum</i> | <i>dicoccoides</i> | - | NA |
| G3006    | PI 538678 | 4X | <i>Triticum</i> | <i>turgidum</i> | <i>dicoccoides</i> | - | NA |
| G3007    | PI 538679 | 4X | <i>Triticum</i> | <i>turgidum</i> | <i>dicoccoides</i> | - | NA |
| G3012    | PI 538680 | 4X | <i>Triticum</i> | <i>turgidum</i> | <i>dicoccoides</i> | - | NA |
| G3013    | PI 538681 | 4X | <i>Triticum</i> | <i>turgidum</i> | <i>dicoccoides</i> | - | NA |
| G3014    | PI 538682 | 4X | <i>Triticum</i> | <i>turgidum</i> | <i>dicoccoides</i> | - | NA |
| G3017    | PI 538684 | 4X | <i>Triticum</i> | <i>turgidum</i> | <i>dicoccoides</i> | - | NA |
| G3035    | PI 538686 | 4X | <i>Triticum</i> | <i>turgidum</i> | <i>dicoccoides</i> | - | NA |
| G3038    | PI 538688 | 4X | <i>Triticum</i> | <i>turgidum</i> | <i>dicoccoides</i> | - | NA |
| G3050    | PI 538690 | 4X | <i>Triticum</i> | <i>turgidum</i> | <i>dicoccoides</i> | - | NA |
| G3051    | PI 538691 | 4X | <i>Triticum</i> | <i>turgidum</i> | <i>dicoccoides</i> | - | NA |
| G3054    | PI 538694 | 4X | <i>Triticum</i> | <i>turgidum</i> | <i>dicoccoides</i> | - | NA |
| G3063    | PI 538695 | 4X | <i>Triticum</i> | <i>turgidum</i> | <i>dicoccoides</i> | - | NA |
| G3064    | PI 538696 | 4X | <i>Triticum</i> | <i>turgidum</i> | <i>dicoccoides</i> | - | NA |
| G3065    | PI 538697 | 4X | <i>Triticum</i> | <i>turgidum</i> | <i>dicoccoides</i> | - | NA |
| G3066    | PI 538698 | 4X | <i>Triticum</i> | <i>turgidum</i> | <i>dicoccoides</i> | - | NA |
| Td 14-2  | NA        | 4X | <i>Triticum</i> | <i>turgidum</i> | <i>dicoccoides</i> | - | NA |
| Td 14-13 | NA        | 4X | <i>Triticum</i> | <i>turgidum</i> | <i>dicoccoides</i> | - | NA |
| Td 14-25 | NA        | 4X | <i>Triticum</i> | <i>turgidum</i> | <i>dicoccoides</i> | - | NA |
| Td 14-34 | NA        | 4X | <i>Triticum</i> | <i>turgidum</i> | <i>dicoccoides</i> | - | NA |
| Td 14-35 | NA        | 4X | <i>Triticum</i> | <i>turgidum</i> | <i>dicoccoides</i> | - | NA |
| Td 14-36 | NA        | 4X | <i>Triticum</i> | <i>turgidum</i> | <i>dicoccoides</i> | - | NA |
| Td 14-40 | NA        | 4X | <i>Triticum</i> | <i>turgidum</i> | <i>dicoccoides</i> | - | NA |
| Td 14-45 | NA        | 4X | <i>Triticum</i> | <i>turgidum</i> | <i>dicoccoides</i> | - | NA |
| Td 14-47 | NA        | 4X | <i>Triticum</i> | <i>turgidum</i> | <i>dicoccoides</i> | - | NA |
| Td 14-49 | NA        | 4X | <i>Triticum</i> | <i>turgidum</i> | <i>dicoccoides</i> | - | NA |
| Td 15-2  | NA        | 4X | <i>Triticum</i> | <i>turgidum</i> | <i>dicoccoides</i> | - | NA |
| Td 15-17 | NA        | 4X | <i>Triticum</i> | <i>turgidum</i> | <i>dicoccoides</i> | - | NA |
| Td 15-18 | NA        | 4X | <i>Triticum</i> | <i>turgidum</i> | <i>dicoccoides</i> | - | NA |
| Td 15-19 | NA        | 4X | <i>Triticum</i> | <i>turgidum</i> | <i>dicoccoides</i> | - | NA |
| Td 15-26 | NA        | 4X | <i>Triticum</i> | <i>turgidum</i> | <i>dicoccoides</i> | - | -  |
| Td 15-32 | NA        | 4X | <i>Triticum</i> | <i>turgidum</i> | <i>dicoccoides</i> | - | NA |

|          |    |    |                 |                 |                    |   |    |
|----------|----|----|-----------------|-----------------|--------------------|---|----|
| Td 15-37 | NA | 4X | <i>Triticum</i> | <i>turgidum</i> | <i>dicoccoides</i> | - | NA |
| Td 15-43 | NA | 4X | <i>Triticum</i> | <i>turgidum</i> | <i>dicoccoides</i> | - | NA |
| Td 15-52 | NA | 4X | <i>Triticum</i> | <i>turgidum</i> | <i>dicoccoides</i> | - | NA |
| Td 16-1  | NA | 4X | <i>Triticum</i> | <i>turgidum</i> | <i>dicoccoides</i> | - | -  |
| Td 16-29 | NA | 4X | <i>Triticum</i> | <i>turgidum</i> | <i>dicoccoides</i> | - | -  |
| Td 17-1  | NA | 4X | <i>Triticum</i> | <i>turgidum</i> | <i>dicoccoides</i> | - | NA |
| Td 17-2  | NA | 4X | <i>Triticum</i> | <i>turgidum</i> | <i>dicoccoides</i> | - | NA |
| Td 17-22 | NA | 4X | <i>Triticum</i> | <i>turgidum</i> | <i>dicoccoides</i> | - | NA |
| Td 18-1  | NA | 4X | <i>Triticum</i> | <i>turgidum</i> | <i>dicoccoides</i> | - | -  |
| Td 18-10 | NA | 4X | <i>Triticum</i> | <i>turgidum</i> | <i>dicoccoides</i> | - | -  |
| Td 18-15 | NA | 4X | <i>Triticum</i> | <i>turgidum</i> | <i>dicoccoides</i> | - | NA |
| Td 18-16 | NA | 4X | <i>Triticum</i> | <i>turgidum</i> | <i>dicoccoides</i> | - | NA |
| Td 18-20 | NA | 4X | <i>Triticum</i> | <i>turgidum</i> | <i>dicoccoides</i> | - | -  |
| Td 18-24 | NA | 4X | <i>Triticum</i> | <i>turgidum</i> | <i>dicoccoides</i> | - | NA |
| Td 18-37 | NA | 4X | <i>Triticum</i> | <i>turgidum</i> | <i>dicoccoides</i> | - | NA |
| Td 18-48 | NA | 4X | <i>Triticum</i> | <i>turgidum</i> | <i>dicoccoides</i> | - | NA |
| Td 18-49 | NA | 4X | <i>Triticum</i> | <i>turgidum</i> | <i>dicoccoides</i> | - | NA |
| Td 18-56 | NA | 4X | <i>Triticum</i> | <i>turgidum</i> | <i>dicoccoides</i> | - | +  |
| Td 19-6  | NA | 4X | <i>Triticum</i> | <i>turgidum</i> | <i>dicoccoides</i> | - | NA |
| Td 19-7  | NA | 4X | <i>Triticum</i> | <i>turgidum</i> | <i>dicoccoides</i> | - | NA |
| Td 19-20 | NA | 4X | <i>Triticum</i> | <i>turgidum</i> | <i>dicoccoides</i> | - | NA |
| Td 19-23 | NA | 4X | <i>Triticum</i> | <i>turgidum</i> | <i>dicoccoides</i> | - | NA |
| Td 19-24 | NA | 4X | <i>Triticum</i> | <i>turgidum</i> | <i>dicoccoides</i> | - | NA |
| Td 19-25 | NA | 4X | <i>Triticum</i> | <i>turgidum</i> | <i>dicoccoides</i> | - | NA |
| Td 19-29 | NA | 4X | <i>Triticum</i> | <i>turgidum</i> | <i>dicoccoides</i> | - | NA |
| Td 19-36 | NA | 4X | <i>Triticum</i> | <i>turgidum</i> | <i>dicoccoides</i> | - | NA |
| Td 19-45 | NA | 4X | <i>Triticum</i> | <i>turgidum</i> | <i>dicoccoides</i> | - | NA |
| Td 19-50 | NA | 4X | <i>Triticum</i> | <i>turgidum</i> | <i>dicoccoides</i> | - | NA |
| Td 19-51 | NA | 4X | <i>Triticum</i> | <i>turgidum</i> | <i>dicoccoides</i> | - | NA |
| Td 20-8  | NA | 4X | <i>Triticum</i> | <i>turgidum</i> | <i>dicoccoides</i> | - | NA |
| Td 20-9  | NA | 4X | <i>Triticum</i> | <i>turgidum</i> | <i>dicoccoides</i> | - | NA |
| Td 20-11 | NA | 4X | <i>Triticum</i> | <i>turgidum</i> | <i>dicoccoides</i> | - | NA |
| Td 20-20 | NA | 4X | <i>Triticum</i> | <i>turgidum</i> | <i>dicoccoides</i> | - | NA |
| Td 20-22 | NA | 4X | <i>Triticum</i> | <i>turgidum</i> | <i>dicoccoides</i> | - | NA |

|           |    |    |                 |                 |                    |   |    |
|-----------|----|----|-----------------|-----------------|--------------------|---|----|
| Td 20-31  | NA | 4X | <i>Triticum</i> | <i>turgidum</i> | <i>dicoccoides</i> | - | NA |
| Td 20-34  | NA | 4X | <i>Triticum</i> | <i>turgidum</i> | <i>dicoccoides</i> | - | NA |
| Td 20-35  | NA | 4X | <i>Triticum</i> | <i>turgidum</i> | <i>dicoccoides</i> | - | NA |
| Td 20-37  | NA | 4X | <i>Triticum</i> | <i>turgidum</i> | <i>dicoccoides</i> | - | NA |
| Td 20-38  | NA | 4X | <i>Triticum</i> | <i>turgidum</i> | <i>dicoccoides</i> | - | NA |
| Td 20-42  | NA | 4X | <i>Triticum</i> | <i>turgidum</i> | <i>dicoccoides</i> | - | NA |
| Td 30     | NA | 4X | <i>Triticum</i> | <i>turgidum</i> | <i>dicoccoides</i> | - | -  |
| Td 32-14  | NA | 4X | <i>Triticum</i> | <i>turgidum</i> | <i>dicoccoides</i> | - | NA |
| Td 32-25  | NA | 4X | <i>Triticum</i> | <i>turgidum</i> | <i>dicoccoides</i> | - | NA |
| Td 32-29  | NA | 4X | <i>Triticum</i> | <i>turgidum</i> | <i>dicoccoides</i> | - | NA |
| Td 32- 30 | NA | 4X | <i>Triticum</i> | <i>turgidum</i> | <i>dicoccoides</i> | - | NA |
| Td 32-44  | NA | 4X | <i>Triticum</i> | <i>turgidum</i> | <i>dicoccoides</i> | - | NA |
| Td 32-45  | NA | 4X | <i>Triticum</i> | <i>turgidum</i> | <i>dicoccoides</i> | - | NA |
| Td 32-46  | NA | 4X | <i>Triticum</i> | <i>turgidum</i> | <i>dicoccoides</i> | - | NA |
| Td 36-12  | NA | 4X | <i>Triticum</i> | <i>turgidum</i> | <i>dicoccoides</i> | - | -  |
| Td 36-17  | NA | 4X | <i>Triticum</i> | <i>turgidum</i> | <i>dicoccoides</i> | - | NA |
| Td 36-21  | NA | 4X | <i>Triticum</i> | <i>turgidum</i> | <i>dicoccoides</i> | - | NA |
| Td 36-22  | NA | 4X | <i>Triticum</i> | <i>turgidum</i> | <i>dicoccoides</i> | - | NA |
| Td 36-25  | NA | 4X | <i>Triticum</i> | <i>turgidum</i> | <i>dicoccoides</i> | - | NA |
| Td 36-26  | NA | 4X | <i>Triticum</i> | <i>turgidum</i> | <i>dicoccoides</i> | - | NA |
| Td 36-33  | NA | 4X | <i>Triticum</i> | <i>turgidum</i> | <i>dicoccoides</i> | - | NA |
| Td 36-37  | NA | 4X | <i>Triticum</i> | <i>turgidum</i> | <i>dicoccoides</i> | - | NA |
| Td 36-38  | NA | 4X | <i>Triticum</i> | <i>turgidum</i> | <i>dicoccoides</i> | - | NA |
| Td 36-39  | NA | 4X | <i>Triticum</i> | <i>turgidum</i> | <i>dicoccoides</i> | - | NA |
| Td 36-40  | NA | 4X | <i>Triticum</i> | <i>turgidum</i> | <i>dicoccoides</i> | - | NA |
| Td A-33   | NA | 4X | <i>Triticum</i> | <i>turgidum</i> | <i>dicoccoides</i> | - | -  |
| Td A-35   | NA | 4X | <i>Triticum</i> | <i>turgidum</i> | <i>dicoccoides</i> | - | -  |
| Td A-51   | NA | 4X | <i>Triticum</i> | <i>turgidum</i> | <i>dicoccoides</i> | - | NA |
| Td A-52   | NA | 4X | <i>Triticum</i> | <i>turgidum</i> | <i>dicoccoides</i> | - | NA |
| Td A-56   | NA | 4X | <i>Triticum</i> | <i>turgidum</i> | <i>dicoccoides</i> | - | NA |
| Td A-57   | NA | 4X | <i>Triticum</i> | <i>turgidum</i> | <i>dicoccoides</i> | - | NA |
| Td A-61   | NA | 4X | <i>Triticum</i> | <i>turgidum</i> | <i>dicoccoides</i> | - | NA |
| Td A-69   | NA | 4X | <i>Triticum</i> | <i>turgidum</i> | <i>dicoccoides</i> | - | NA |
| Td B-6    | NA | 4X | <i>Triticum</i> | <i>turgidum</i> | <i>dicoccoides</i> | - | +  |

|                |    |    |                 |                 |                    |   |    |
|----------------|----|----|-----------------|-----------------|--------------------|---|----|
| Td B-8         | NA | 4X | <i>Triticum</i> | <i>turgidum</i> | <i>dicoccoides</i> | - | NA |
| Td B-13        | NA | 4X | <i>Triticum</i> | <i>turgidum</i> | <i>dicoccoides</i> | - | NA |
| Td B-16        | NA | 4X | <i>Triticum</i> | <i>turgidum</i> | <i>dicoccoides</i> | - | +  |
| Td B-19        | NA | 4X | <i>Triticum</i> | <i>turgidum</i> | <i>dicoccoides</i> | - | NA |
| Td B-31        | NA | 4X | <i>Triticum</i> | <i>turgidum</i> | <i>dicoccoides</i> | - | NA |
| Td B-32        | NA | 4X | <i>Triticum</i> | <i>turgidum</i> | <i>dicoccoides</i> | - | NA |
| Td B-34        | NA | 4X | <i>Triticum</i> | <i>turgidum</i> | <i>dicoccoides</i> | - | NA |
| Td B-35        | NA | 4X | <i>Triticum</i> | <i>turgidum</i> | <i>dicoccoides</i> | - | NA |
| Td B-37        | NA | 4X | <i>Triticum</i> | <i>turgidum</i> | <i>dicoccoides</i> | - | NA |
| Td B-40        | NA | 4X | <i>Triticum</i> | <i>turgidum</i> | <i>dicoccoides</i> | - | NA |
| Td C-7         | NA | 4X | <i>Triticum</i> | <i>turgidum</i> | <i>dicoccoides</i> | - | NA |
| Td C-13        | NA | 4X | <i>Triticum</i> | <i>turgidum</i> | <i>dicoccoides</i> | - | NA |
| Td C-19        | NA | 4X | <i>Triticum</i> | <i>turgidum</i> | <i>dicoccoides</i> | - | -  |
| Td C-21        | NA | 4X | <i>Triticum</i> | <i>turgidum</i> | <i>dicoccoides</i> | - | NA |
| Td C-27        | NA | 4X | <i>Triticum</i> | <i>turgidum</i> | <i>dicoccoides</i> | - | NA |
| Td C-30        | NA | 4X | <i>Triticum</i> | <i>turgidum</i> | <i>dicoccoides</i> | - | NA |
| Td C-36        | NA | 4X | <i>Triticum</i> | <i>turgidum</i> | <i>dicoccoides</i> | - | -  |
| Td C-52        | NA | 4X | <i>Triticum</i> | <i>turgidum</i> | <i>dicoccoides</i> | - | NA |
| Td C-55        | NA | 4X | <i>Triticum</i> | <i>turgidum</i> | <i>dicoccoides</i> | - | NA |
| Td F-3         | NA | 4X | <i>Triticum</i> | <i>turgidum</i> | <i>dicoccoides</i> | - | NA |
| Td F-7         | NA | 4X | <i>Triticum</i> | <i>turgidum</i> | <i>dicoccoides</i> | - | NA |
| Td F-18        | NA | 4X | <i>Triticum</i> | <i>turgidum</i> | <i>dicoccoides</i> | - | NA |
| Td F-25        | NA | 4X | <i>Triticum</i> | <i>turgidum</i> | <i>dicoccoides</i> | - | NA |
| Td F-28        | NA | 4X | <i>Triticum</i> | <i>turgidum</i> | <i>dicoccoides</i> | - | NA |
| Td F-37        | NA | 4X | <i>Triticum</i> | <i>turgidum</i> | <i>dicoccoides</i> | - | NA |
| Td F-38        | NA | 4X | <i>Triticum</i> | <i>turgidum</i> | <i>dicoccoides</i> | - | NA |
| Td F-43        | NA | 4X | <i>Triticum</i> | <i>turgidum</i> | <i>dicoccoides</i> | - | NA |
| Td F-54        | NA | 4X | <i>Triticum</i> | <i>turgidum</i> | <i>dicoccoides</i> | - | NA |
| Td F-65        | NA | 4X | <i>Triticum</i> | <i>turgidum</i> | <i>dicoccoides</i> | - | NA |
| Td F-81        | NA | 4X | <i>Triticum</i> | <i>turgidum</i> | <i>dicoccoides</i> | - | NA |
| <b>Td G-11</b> | NA | 4X | <i>Triticum</i> | <i>turgidum</i> | <i>dicoccoides</i> | - | +  |
| Td G-15        | NA | 4X | <i>Triticum</i> | <i>turgidum</i> | <i>dicoccoides</i> | - | NA |
| Td G-22        | NA | 4X | <i>Triticum</i> | <i>turgidum</i> | <i>dicoccoides</i> | - | NA |
| Td G-42        | NA | 4X | <i>Triticum</i> | <i>turgidum</i> | <i>dicoccoides</i> | - | NA |

|         |    |    |                 |                 |                    |   |    |
|---------|----|----|-----------------|-----------------|--------------------|---|----|
| Td G-47 | NA | 4X | <i>Triticum</i> | <i>turgidum</i> | <i>dicoccoides</i> | - | NA |
| Td G-50 | NA | 4X | <i>Triticum</i> | <i>turgidum</i> | <i>dicoccoides</i> | - | NA |
| Td G-52 | NA | 4X | <i>Triticum</i> | <i>turgidum</i> | <i>dicoccoides</i> | - | NA |
| Td G-56 | NA | 4X | <i>Triticum</i> | <i>turgidum</i> | <i>dicoccoides</i> | - | NA |
| Td G-58 | NA | 4X | <i>Triticum</i> | <i>turgidum</i> | <i>dicoccoides</i> | - | NA |
| Td G-59 | NA | 4X | <i>Triticum</i> | <i>turgidum</i> | <i>dicoccoides</i> | - | NA |
| Td G-61 | NA | 4X | <i>Triticum</i> | <i>turgidum</i> | <i>dicoccoides</i> | - | NA |
| Td I-4  | NA | 4X | <i>Triticum</i> | <i>turgidum</i> | <i>dicoccoides</i> | - | NA |
| Td I-15 | NA | 4X | <i>Triticum</i> | <i>turgidum</i> | <i>dicoccoides</i> | - | NA |
| Td I-17 | NA | 4X | <i>Triticum</i> | <i>turgidum</i> | <i>dicoccoides</i> | - | NA |
| Td I-18 | NA | 4X | <i>Triticum</i> | <i>turgidum</i> | <i>dicoccoides</i> | - | NA |
| Td I-20 | NA | 4X | <i>Triticum</i> | <i>turgidum</i> | <i>dicoccoides</i> | - | NA |
| Td I-29 | NA | 4X | <i>Triticum</i> | <i>turgidum</i> | <i>dicoccoides</i> | - | NA |
| Td I-39 | NA | 4X | <i>Triticum</i> | <i>turgidum</i> | <i>dicoccoides</i> | - | NA |
| Td I-40 | NA | 4X | <i>Triticum</i> | <i>turgidum</i> | <i>dicoccoides</i> | - | NA |
| Td I-44 | NA | 4X | <i>Triticum</i> | <i>turgidum</i> | <i>dicoccoides</i> | - | NA |
| Td I-45 | NA | 4X | <i>Triticum</i> | <i>turgidum</i> | <i>dicoccoides</i> | - | NA |
| Td I-50 | NA | 4X | <i>Triticum</i> | <i>turgidum</i> | <i>dicoccoides</i> | - | +  |
| Td K-19 | NA | 4X | <i>Triticum</i> | <i>turgidum</i> | <i>dicoccoides</i> | - | NA |
| Td K-32 | NA | 4X | <i>Triticum</i> | <i>turgidum</i> | <i>dicoccoides</i> | - | NA |
| Td K-36 | NA | 4X | <i>Triticum</i> | <i>turgidum</i> | <i>dicoccoides</i> | - | NA |
| Td K-45 | NA | 4X | <i>Triticum</i> | <i>turgidum</i> | <i>dicoccoides</i> | - | NA |
| Td K-46 | NA | 4X | <i>Triticum</i> | <i>turgidum</i> | <i>dicoccoides</i> | - | NA |
| Td K-50 | NA | 4X | <i>Triticum</i> | <i>turgidum</i> | <i>dicoccoides</i> | - | NA |
| Td L-1  | NA | 4X | <i>Triticum</i> | <i>turgidum</i> | <i>dicoccoides</i> | - | -  |
| Td L-10 | NA | 4X | <i>Triticum</i> | <i>turgidum</i> | <i>dicoccoides</i> | - | -  |
| Td L-25 | NA | 4X | <i>Triticum</i> | <i>turgidum</i> | <i>dicoccoides</i> | - | NA |
| Td L-28 | NA | 4X | <i>Triticum</i> | <i>turgidum</i> | <i>dicoccoides</i> | - | NA |
| Td L-29 | NA | 4X | <i>Triticum</i> | <i>turgidum</i> | <i>dicoccoides</i> | - | NA |
| Td L-33 | NA | 4X | <i>Triticum</i> | <i>turgidum</i> | <i>dicoccoides</i> | - | -  |
| Td L-34 | NA | 4X | <i>Triticum</i> | <i>turgidum</i> | <i>dicoccoides</i> | - | NA |
| Td L-40 | NA | 4X | <i>Triticum</i> | <i>turgidum</i> | <i>dicoccoides</i> | - | -  |
| Td L-43 | NA | 4X | <i>Triticum</i> | <i>turgidum</i> | <i>dicoccoides</i> | - | NA |
| Td L-56 | NA | 4X | <i>Triticum</i> | <i>turgidum</i> | <i>dicoccoides</i> | - | NA |

|               |           |    |                 |                   |                    |   |    |
|---------------|-----------|----|-----------------|-------------------|--------------------|---|----|
| Td L-61       | NA        | 4X | <i>Triticum</i> | <i>turgidum</i>   | <i>dicoccoides</i> | - | NA |
| Td T-7-1      | NA        | 4X | <i>Triticum</i> | <i>turgidum</i>   | <i>dicoccoides</i> | - | NA |
| Td T-7-5      | NA        | 4X | <i>Triticum</i> | <i>turgidum</i>   | <i>dicoccoides</i> | - | NA |
| Td T-7-7      | NA        | 4X | <i>Triticum</i> | <i>turgidum</i>   | <i>dicoccoides</i> | - | NA |
| Td T-7-8      | NA        | 4X | <i>Triticum</i> | <i>turgidum</i>   | <i>dicoccoides</i> | - | NA |
| Td T-7-15     | NA        | 4X | <i>Triticum</i> | <i>turgidum</i>   | <i>dicoccoides</i> | - | NA |
| Td T-7-18     | NA        | 4X | <i>Triticum</i> | <i>turgidum</i>   | <i>dicoccoides</i> | - | NA |
| Td T-7-21     | NA        | 4X | <i>Triticum</i> | <i>turgidum</i>   | <i>dicoccoides</i> | - | NA |
| Td T-7-26     | NA        | 4X | <i>Triticum</i> | <i>turgidum</i>   | <i>dicoccoides</i> | - | NA |
| Td T-7-30     | NA        | 4X | <i>Triticum</i> | <i>turgidum</i>   | <i>dicoccoides</i> | - | -  |
| Td T-7-35     | NA        | 4X | <i>Triticum</i> | <i>turgidum</i>   | <i>dicoccoides</i> | - | NA |
| Td T-7-40     | NA        | 4X | <i>Triticum</i> | <i>turgidum</i>   | <i>dicoccoides</i> | - | NA |
| Td T-7-45     | NA        | 4X | <i>Triticum</i> | <i>turgidum</i>   | <i>dicoccoides</i> | - | -  |
| Td 15-1       | NA        | 4X | <i>Triticum</i> | <i>turgidum</i>   | <i>dicoccoides</i> | - | NA |
| Td 15-55      | NA        | 4X | <i>Triticum</i> | <i>turgidum</i>   | <i>dicoccoides</i> | - | NA |
| Td 328        | NA        | 4X | <i>Triticum</i> | <i>turgidum</i>   | <i>dicoccoides</i> | - | +  |
| <b>Td 582</b> | NA        | 4X | <i>Triticum</i> | <i>turgidum</i>   | <i>dicoccoides</i> | - | +  |
| Ae 1          | Clae 45   | 2X | <i>Aegilops</i> | <i>speltoides</i> |                    | - | -  |
| Ae 2          | Clae 57   | 2X | <i>Aegilops</i> | <i>speltoides</i> |                    | - | +  |
| Ae 3          | Clae 61   | 2X | <i>Aegilops</i> | <i>speltoides</i> |                    | - | -  |
| Ae 4          | PI 170203 | 2X | <i>Aegilops</i> | <i>speltoides</i> |                    | - | -  |
| Ae 5          | PI 170204 | 2X | <i>Aegilops</i> | <i>speltoides</i> |                    | - | -  |
| Ae 6          | PI 172685 | 2X | <i>Aegilops</i> | <i>speltoides</i> |                    | - | -  |
| Ae 7          | PI 173614 | 2X | <i>Aegilops</i> | <i>speltoides</i> |                    | - | -  |
| Ae 8          | PI 174010 | 2X | <i>Aegilops</i> | <i>speltoides</i> |                    | - | -  |
| Ae 9          | PI 219867 | 2X | <i>Aegilops</i> | <i>speltoides</i> |                    | - | -  |
| Ae 10         | PI 254865 | 2X | <i>Aegilops</i> | <i>speltoides</i> |                    | - | -  |
| Ae 11         | PI 266817 | 2X | <i>Aegilops</i> | <i>speltoides</i> |                    | - | -  |
| Ae 12         | PI 315853 | 2X | <i>Aegilops</i> | <i>speltoides</i> |                    | - | -  |
| Ae 13         | PI 330488 | 2X | <i>Aegilops</i> | <i>speltoides</i> |                    | - | -  |
| Ae 14         | PI 369581 | 2X | <i>Aegilops</i> | <i>speltoides</i> |                    | - | -  |
| Ae 15         | PI 369582 | 2X | <i>Aegilops</i> | <i>speltoides</i> |                    | - | -  |
| Ae 16         | PI 369583 | 2X | <i>Aegilops</i> | <i>speltoides</i> |                    | - | -  |
| Ae 17         | PI 369584 | 2X | <i>Aegilops</i> | <i>speltoides</i> |                    | - | -  |

---

|       |           |    |                 |                   |   |   |
|-------|-----------|----|-----------------|-------------------|---|---|
| Ae 18 | PI 369585 | 2X | <i>Aegilops</i> | <i>speltoides</i> | - | - |
| Ae 19 | PI 369586 | 2X | <i>Aegilops</i> | <i>speltoides</i> | - | - |
| Ae 20 | PI 369587 | 2X | <i>Aegilops</i> | <i>speltoides</i> | - | - |
| Ae 21 | PI 369588 | 2X | <i>Aegilops</i> | <i>speltoides</i> | - | - |
| Ae 22 | PI 369589 | 2X | <i>Aegilops</i> | <i>speltoides</i> | - | - |
| Ae 23 | PI 369591 | 2X | <i>Aegilops</i> | <i>speltoides</i> | - | - |
| Ae 24 | PI 369592 | 2X | <i>Aegilops</i> | <i>speltoides</i> | - | - |
| Ae 25 | PI 369593 | 2X | <i>Aegilops</i> | <i>speltoides</i> | - | - |
| Ae 26 | PI 369594 | 2X | <i>Aegilops</i> | <i>speltoides</i> | - | - |
| Ae 27 | PI 369595 | 2X | <i>Aegilops</i> | <i>speltoides</i> | - | - |
| Ae 28 | PI 369596 | 2X | <i>Aegilops</i> | <i>speltoides</i> | - | - |
| Ae 29 | PI 369597 | 2X | <i>Aegilops</i> | <i>speltoides</i> | - | - |
| Ae 30 | PI 369598 | 2X | <i>Aegilops</i> | <i>speltoides</i> | - | - |
| Ae 31 | PI 369599 | 2X | <i>Aegilops</i> | <i>speltoides</i> | - | - |
| Ae 32 | PI 369600 | 2X | <i>Aegilops</i> | <i>speltoides</i> | - | - |
| Ae 33 | PI 369601 | 2X | <i>Aegilops</i> | <i>speltoides</i> | - | - |
| Ae 34 | PI 369602 | 2X | <i>Aegilops</i> | <i>speltoides</i> | - | - |
| Ae 35 | PI 369603 | 2X | <i>Aegilops</i> | <i>speltoides</i> | - | - |
| Ae 36 | PI 369604 | 2X | <i>Aegilops</i> | <i>speltoides</i> | - | - |
| Ae 37 | PI 369605 | 2X | <i>Aegilops</i> | <i>speltoides</i> | - | - |
| Ae 38 | PI 369606 | 2X | <i>Aegilops</i> | <i>speltoides</i> | - | - |
| Ae 39 | PI 369607 | 2X | <i>Aegilops</i> | <i>speltoides</i> | - | - |
| Ae 40 | PI 369608 | 2X | <i>Aegilops</i> | <i>speltoides</i> | - | - |
| Ae 41 | PI 369609 | 2X | <i>Aegilops</i> | <i>speltoides</i> | - | - |
| Ae 42 | PI 369610 | 2X | <i>Aegilops</i> | <i>speltoides</i> | - | - |
| Ae 43 | PI 369611 | 2X | <i>Aegilops</i> | <i>speltoides</i> | - | - |
| Ae 44 | PI 369613 | 2X | <i>Aegilops</i> | <i>speltoides</i> | - | - |
| Ae 45 | PI 369614 | 2X | <i>Aegilops</i> | <i>speltoides</i> | - | - |
| Ae 46 | PI 369615 | 2X | <i>Aegilops</i> | <i>speltoides</i> | - | - |
| Ae 47 | PI 369616 | 2X | <i>Aegilops</i> | <i>speltoides</i> | - | - |
| Ae 48 | PI 369617 | 2X | <i>Aegilops</i> | <i>speltoides</i> | - | - |
| Ae 49 | PI 369618 | 2X | <i>Aegilops</i> | <i>speltoides</i> | - | - |
| Ae 50 | PI 369620 | 2X | <i>Aegilops</i> | <i>speltoides</i> | - | - |
| Ae 51 | PI 369621 | 2X | <i>Aegilops</i> | <i>speltoides</i> | - | - |

---

|       |           |    |                 |                   |                   |   |   |
|-------|-----------|----|-----------------|-------------------|-------------------|---|---|
| Ae 52 | PI 369622 | 2X | <i>Aegilops</i> | <i>speltoides</i> |                   | - | - |
| Ae 53 | PI 369623 | 2X | <i>Aegilops</i> | <i>speltoides</i> |                   | - | - |
| Ae 54 | PI 369624 | 2X | <i>Aegilops</i> | <i>speltoides</i> |                   | - | - |
| Ae 55 | PI 369625 | 2X | <i>Aegilops</i> | <i>speltoides</i> |                   | - | - |
| Ae 56 | PI 369626 | 2X | <i>Aegilops</i> | <i>speltoides</i> |                   | - | - |
| Ae 57 | PI 369660 | 2X | <i>Aegilops</i> | <i>speltoides</i> |                   | - | - |
| Ae 58 | PI 369661 | 2X | <i>Aegilops</i> | <i>speltoides</i> |                   | - | - |
| Ae 59 | PI 369662 | 2X | <i>Aegilops</i> | <i>speltoides</i> |                   | - | - |
| Ae 60 | PI 369663 | 2X | <i>Aegilops</i> | <i>speltoides</i> |                   | - | - |
| Ae 61 | PI 369664 | 2X | <i>Aegilops</i> | <i>speltoides</i> |                   | - | - |
| Ae 62 | PI 369665 | 2X | <i>Aegilops</i> | <i>speltoides</i> |                   | - | - |
| Ae 63 | PI 369666 | 2X | <i>Aegilops</i> | <i>speltoides</i> |                   | - | - |
| Ae 64 | PI 393492 | 2X | <i>Aegilops</i> | <i>speltoides</i> |                   | - | - |
| Ae 65 | PI 393494 | 2X | <i>Aegilops</i> | <i>speltoides</i> |                   | - | - |
| Ae 66 | PI 393495 | 2X | <i>Aegilops</i> | <i>speltoides</i> |                   | - | - |
| Ae 67 | PI 422448 | 2X | <i>Aegilops</i> | <i>speltoides</i> |                   | - | - |
| Ae 68 | PI 449338 | 2X | <i>Aegilops</i> | <i>speltoides</i> | <i>speltoides</i> | - | - |
| Ae 69 | PI 449339 | 2X | <i>Aegilops</i> | <i>speltoides</i> |                   | - | - |
| Ae 70 | PI 449340 | 2X | <i>Aegilops</i> | <i>speltoides</i> |                   | - | - |
| Ae 71 | PI 449341 | 2X | <i>Aegilops</i> | <i>speltoides</i> |                   | - | - |
| Ae 72 | PI 487231 | 2X | <i>Aegilops</i> | <i>speltoides</i> |                   | - | - |
| Ae 73 | PI 487232 | 2X | <i>Aegilops</i> | <i>speltoides</i> |                   | - | - |
| Ae 74 | PI 487235 | 2X | <i>Aegilops</i> | <i>speltoides</i> |                   | - | - |
| Ae 75 | PI 487238 | 2X | <i>Aegilops</i> | <i>speltoides</i> |                   | - | - |
| Ae 76 | PI 542238 | 2X | <i>Aegilops</i> | <i>speltoides</i> |                   | - | - |
| Ae 77 | PI 542239 | 2X | <i>Aegilops</i> | <i>speltoides</i> | <i>ligustica</i>  | - | - |
| Ae 78 | PI 542240 | 2X | <i>Aegilops</i> | <i>speltoides</i> | <i>ligustica</i>  | - | - |
| Ae 79 | PI 542241 | 2X | <i>Aegilops</i> | <i>speltoides</i> | <i>ligustica</i>  | - | - |
| Ae 80 | PI 542242 | 2X | <i>Aegilops</i> | <i>speltoides</i> | <i>ligustica</i>  | - | - |
| Ae 81 | PI 542243 | 2X | <i>Aegilops</i> | <i>speltoides</i> | <i>ligustica</i>  | - | - |
| Ae 82 | PI 542244 | 2X | <i>Aegilops</i> | <i>speltoides</i> | <i>ligustica</i>  | - | - |
| Ae 83 | PI 542245 | 2X | <i>Aegilops</i> | <i>speltoides</i> | <i>ligustica</i>  | - | - |
| Ae 84 | PI 542246 | 2X | <i>Aegilops</i> | <i>speltoides</i> | <i>ligustica</i>  | - | - |
| Ae 85 | PI 542247 | 2X | <i>Aegilops</i> | <i>speltoides</i> | <i>ligustica</i>  | - | - |

---

|              |           |    |                 |                   |                   |   |   |
|--------------|-----------|----|-----------------|-------------------|-------------------|---|---|
| Ae 86        | PI 542248 | 2X | <i>Aegilops</i> | <i>speltoides</i> | <i>ligustica</i>  | - | - |
| Ae 87        | PI 542249 | 2X | <i>Aegilops</i> | <i>speltoides</i> | <i>ligustica</i>  | - | - |
| Ae 88        | PI 542250 | 2X | <i>Aegilops</i> | <i>speltoides</i> | <i>ligustica</i>  | - | - |
| Ae 89        | PI 542252 | 2X | <i>Aegilops</i> | <i>speltoides</i> | <i>ligustica</i>  | - | - |
| Ae 90        | PI 542253 | 2X | <i>Aegilops</i> | <i>speltoides</i> | <i>ligustica</i>  | - | - |
| Ae 91        | PI 542255 | 2X | <i>Aegilops</i> | <i>speltoides</i> | <i>ligustica</i>  | - | - |
| <b>Ae 92</b> | PI 542256 | 2X | <i>Aegilops</i> | <i>speltoides</i> | <i>ligustica</i>  | - | + |
| Ae 93        | PI 542261 | 2X | <i>Aegilops</i> | <i>speltoides</i> | <i>speltoides</i> | - | - |
| Ae 94        | PI 542262 | 2X | <i>Aegilops</i> | <i>speltoides</i> | <i>speltoides</i> | - | - |
| Ae 95        | PI 542265 | 2X | <i>Aegilops</i> | <i>speltoides</i> | <i>speltoides</i> | - | - |
| Ae 96        | PI 542266 | 2X | <i>Aegilops</i> | <i>speltoides</i> | <i>speltoides</i> | - | - |
| Ae 97        | PI 542267 | 2X | <i>Aegilops</i> | <i>speltoides</i> | <i>speltoides</i> | - | - |
| Ae 98        | PI 542269 | 2X | <i>Aegilops</i> | <i>speltoides</i> | <i>speltoides</i> | - | - |
| Ae 99        | PI 542271 | 2X | <i>Aegilops</i> | <i>speltoides</i> | <i>speltoides</i> | - | - |
| Ae 100       | PI 542272 | 2X | <i>Aegilops</i> | <i>speltoides</i> | <i>speltoides</i> | - | - |
| Ae 101       | PI 542273 | 2X | <i>Aegilops</i> | <i>speltoides</i> | <i>speltoides</i> | - | - |
| Ae 102       | PI 542274 | 2X | <i>Aegilops</i> | <i>speltoides</i> | <i>speltoides</i> | - | - |
| Ae 103       | PI 542276 | 2X | <i>Aegilops</i> | <i>speltoides</i> | <i>speltoides</i> | - | - |
| Ae 104       | PI 554291 | 2X | <i>Aegilops</i> | <i>speltoides</i> |                   | - | - |
| Ae 105       | PI 554292 | 2X | <i>Aegilops</i> | <i>speltoides</i> |                   | - | - |
| Ae 106       | PI 554296 | 2X | <i>Aegilops</i> | <i>speltoides</i> |                   | - | - |
| Ae 107       | PI 554297 | 2X | <i>Aegilops</i> | <i>speltoides</i> |                   | - | - |
| Ae 108       | PI 554298 | 2X | <i>Aegilops</i> | <i>speltoides</i> |                   | - | - |
| Ae 109       | PI 554299 | 2X | <i>Aegilops</i> | <i>speltoides</i> |                   | - | - |
| Ae 110       | PI 554300 | 2X | <i>Aegilops</i> | <i>speltoides</i> |                   | - | - |
| Ae 111       | PI 554303 | 2X | <i>Aegilops</i> | <i>speltoides</i> |                   | - | - |
| Ae 112       | PI 554304 | 2X | <i>Aegilops</i> | <i>speltoides</i> |                   | - | - |
| Ae 113       | PI 554305 | 2X | <i>Aegilops</i> | <i>speltoides</i> | <i>ligustica</i>  | - | - |
| Ae 114       | PI 560527 | 2X | <i>Aegilops</i> | <i>speltoides</i> | <i>ligustica</i>  | - | - |
| Ae 115       | PI 560529 | 2X | <i>Aegilops</i> | <i>speltoides</i> | <i>speltoides</i> | - | - |
| Ae 116       | PI 560530 | 2X | <i>Aegilops</i> | <i>speltoides</i> | <i>speltoides</i> | - | - |
| Ae 117       | PI 560747 | 2X | <i>Aegilops</i> | <i>speltoides</i> | <i>speltoides</i> | - | - |
| Ae 118       | PI 560749 | 2X | <i>Aegilops</i> | <i>speltoides</i> | <i>speltoides</i> | - | - |
| Ae 119       | PI 560750 | 2X | <i>Aegilops</i> | <i>speltoides</i> | <i>speltoides</i> | - | - |

---

|        |           |    |                 |                   |                   |   |   |
|--------|-----------|----|-----------------|-------------------|-------------------|---|---|
| Ae 120 | PI 560752 | 2X | <i>Aegilops</i> | <i>speltoides</i> | <i>speltoides</i> | - | - |
| Ae 121 | PI 573449 | 2X | <i>Aegilops</i> | <i>speltoides</i> |                   | - | - |
| Ae 122 | PI 573450 | 2X | <i>Aegilops</i> | <i>speltoides</i> |                   | - | - |
| Ae 123 | PI 573452 | 2X | <i>Aegilops</i> | <i>speltoides</i> |                   | - | - |

<sup>a</sup>The *Snn1* alleles from accessions shown in bold were sequenced and used for phylogenetic analysis to generate the tree in fig. S7.

<sup>b</sup>Plus (+) and minus (-) indicate sensitive and insensitive to SnTox1.

<sup>c</sup>Plus (+) and minus (-) indicate presence and absence of the *Snn1* DNA sequence based on PCR assay.

**table S6. Primers used for sequencing of *Snn1* from genomic DNA.**

| Fragment       | Forward primer                | Reverse primer                  |
|----------------|-------------------------------|---------------------------------|
| 1 <sup>a</sup> | 3476283R3: TCGTTCGATAGGAGTG   | 3476283F9: ATGGCGTAGGAGCACGGGTA |
| 2              | 1ExonR: CGGCTGGAGAGTCGATGCTT  | 600015F: TAATTTGGCAAGGCAGGAGT   |
| 3              | 2IntronR: GGGTGTGCCACATCACAAA | 3ExonF2: GCCAATGGCACCTTGATGG    |
| 4              | 3ExonR1: CAAGGTGCCATTGGCGGTAT | 3UTRF4: TTGCCTCAGCTTCCCCTTTTT   |

<sup>a</sup>This primer pair also used to generate the probe FCG36 amplified from BAC TaaCsp1BS134D22 and used for DNA blot analysis.

**table S7. PCR primers used to amplify the *Snn1* cDNA fragments for sequencing.**

| Fragment | Forward primer                  | Reverse primer                  |
|----------|---------------------------------|---------------------------------|
| 1        | 5UTRF1: CGGGGAAGTTAGACGATTCCTTG | 2ExonF: ATGCGGGAGCTTGCATTCAT    |
| 2        | 600015R: TGCGCCAACTCAACACATAC   | 3ExonF3: CGAGCAGTTGCTCCGCTACC   |
| 3        | 3ExonR: AAGGTGGCCCTCAACTTGGA    | 3UTRR1: GCCTCAGCTTCCCCTTTTTGTAG |

**table S8. PCR primers used to amplify the *Snn1* cDNA 5' and 3' ends.**

| Fragment | Forward primer                            | Reverse primer                             |
|----------|-------------------------------------------|--------------------------------------------|
| 1        | UPM                                       | 5'RACE_R4:<br>CAAGCTCGATCGACGAGAAGGACCAATC |
| 2        | NUP                                       | 5'RACE_R3:<br>AGGGGGATACGAGGAGTCGTTGCACA   |
| 3        | 3'RACE_F3:<br>CAGCACAATCAGCGGACGGTCTAGCTT | UPM                                        |
| 4        | 3'RACE_F2:<br>CACACTGGACAAGTCATCGGCGACA   | NUP                                        |

**table S9. PCR primers used for RQ-PCR analysis.**

| Gene                      | Forward primer                         | Reverse primer                   |
|---------------------------|----------------------------------------|----------------------------------|
| <i>Snn1</i>               | 600015R:<br>TGCGCCAACCTCAACACATAC      | Snn1_RT_R4: GCCAATGGCACCCACAGC   |
| <i>TaMPK3<sup>a</sup></i> | TaMPK3F:<br>TACATGAGGCACCTGCCGCAGT     | TaMPK3R: GGTTCAACTCCAGGGCTTCGTTG |
| <i>TaMPK6<sup>a</sup></i> | TaMPK6F:<br>GAAGATATCCGCCAACTTCCCG     | TaMPK6R: CGCATGCTGCTCGAAGTCAAAGC |
| <i>GAPDH</i>              | GAPDH.F152:<br>CAACGCTAGCTGCACCACTAACT | GAPDH.R338: GCTGCTTGAATGATGTTGA  |

<sup>a</sup>Primers developed by (30)

**table S10. PCR primers used for Y2H analysis.**

| Fragment       | Forward primer <sup>a</sup>                           | Reverse primer                                            |
|----------------|-------------------------------------------------------|-----------------------------------------------------------|
| SnTox1         | SnTox1-52F:<br><u>CCGGAATTC</u> AACGAAGGAATCCTCACGTTT | SnTox1-tagR:<br><u>CGCGGATCC</u> CTAGCACATTCGTAGTCCAGC    |
| Snn1           | Snn1-NdeI-88F:<br><u>CCGCATATGGCTGAGCAGCAGCAAGGTT</u> | Snn1-XhoI-tagR:<br><u>CGCCTCGAGCTACGCTTTACGAGACCGGCCT</u> |
| Snn1 (30-297)  | Snn1-88F:<br><u>CCGGAATTC</u> GCTGAGCAGCAGCAAGGTT     | Snn1-891R:<br><u>CGCGGATCC</u> CTAGCTGATGCAGGCGTAGTCC     |
| Snn1 (30-376)  | Snn1-88F:<br><u>CCGGAATTC</u> GCTGAGCAGCAGCAAGGTT     | Snn1-1128R:<br><u>CGCGGATCC</u> CTATATATCTGAGCAGGTTCCC    |
| Snn1 (158-376) | Snn1-472F:<br><u>CCGGAATTC</u> TGGAGAGTCGATGCTTTTCG   | Snn1-1128R:<br><u>CGCGGATCC</u> CTATATATCTGAGCAGGTTCCC    |
| Snn1 (158-330) | Snn1-472F:<br><u>CCGGAATTC</u> TGGAGAGTCGATGCTTTTCG   | Snn1-990R:<br><u>CGCGGATCC</u> CTATTGGCATCCGTGAGTGATGTA   |
| Snn1 (158-297) | Snn1-472F:<br><u>CCGGAATTC</u> TGGAGAGTCGATGCTTTTCG   | Snn1-891R:<br><u>CGCGGATCC</u> CTAGCTGATGCAGGCGTAGTCC     |
| Snn1 (244-330) | Snn1-730F<br><u>CCGGAATTC</u> GACAAGTCATGGTACAACCTTCT | Snn1-990R:<br><u>CGCGGATCC</u> CTATTGGCATCCGTGAGTGATGTA   |
| Snn1 (298-376) | Snn1-892F:<br><u>CCGGAATTC</u> CGCAACAGCTCTTGCGCCA    | Snn1-1128R:<br><u>CGCGGATCC</u> CTATATATCTGAGCAGGTTCCC    |
| Snn1 (409-714) | Snn1-1225F:<br><u>CCGGAATTC</u> AAGACGGAAGAGTTCTACA   | Snn1-tagR:<br><u>CGCGGATCC</u> CTACGCTTTACGAGACCGGCCT     |
| SnToxA         | SnToxA-F:<br><u>CCGGAATTC</u> CAGGGAAGCTGCATGTCAAT    | SnToxA-R:<br><u>CGCGGATCC</u> CTAATTTTCTAGCTGCATTCTC      |

<sup>a</sup>Nucleotides added to the 5' end of primers for cloning purposes are underlined.
